# Supplementary material for: Identification of absorbed compounds of Xiao Yao San Jia Wei and pharmacokinetic study in depressed rats by force swimming stress
Source: Royal Society of Chemistry journal article supplement (doi:10.1039/d1ra08778a), 2022-01-01
Supplement: d1ra08778a1.pdf [file d1ra08778a1.pdf]

# **Identification of absorbed compounds of Xiao Yao San Jia Wei and pharmacokinetic study in depressed rats by force swimming stress**

Chenxiao Shan<sup>1,2</sup>, Jia Li<sup>1</sup>, Runze Zhou<sup>1</sup>, Po Sun<sup>1</sup>, Min Xu<sup>1</sup>, Qiulong Zhao<sup>1</sup>, Ping Ren<sup>1</sup>,  
Xi Huang<sup>1\*</sup>, Hongmei Wen<sup>2</sup>

## **Affiliation**

1 Institute of TCM-related comorbid depression, Nanjing University of Chinese  
Medicine, Nanjing 210023, Jiangsu, China

2 School of Pharmacy, Nanjing University of Chinese Medicine, Nanjing 210023,  
Jiangsu, China.

## **Correspondence :**

### ***Prof. Xi Huang***

Institute of TCM-related comorbid depression,  
Nanjing University of Chinese Medicine,  
138 xianlin Road, Nanjing, Jiangsu, China.

Phone: +86 13951761464

Email: 290606@njucm.edu.cn

**Keywords :** Identification, Pharmacokinetics, Xiao-Yao-San-Jia-Wei, UFLC-Q-TOF  
MS/MS, UFLC-QQQ-MS/MS

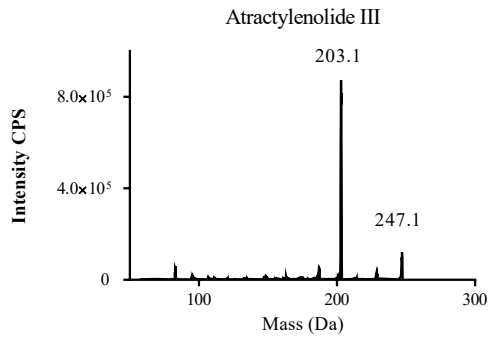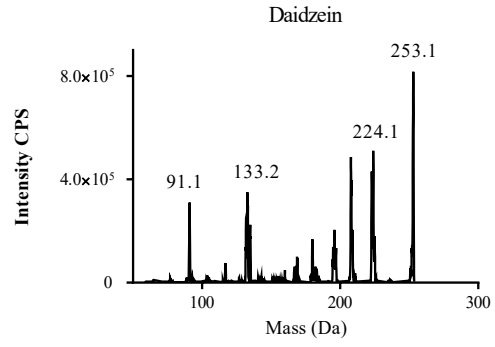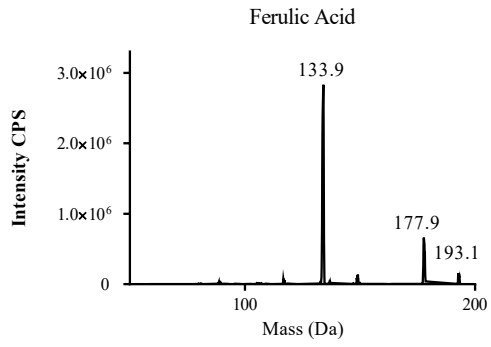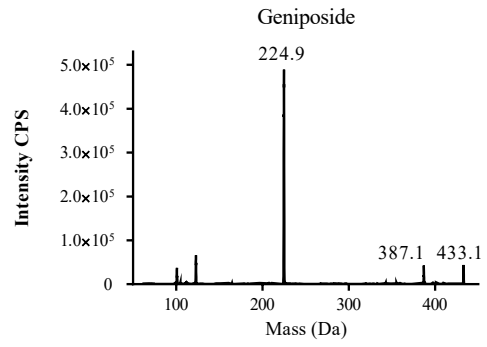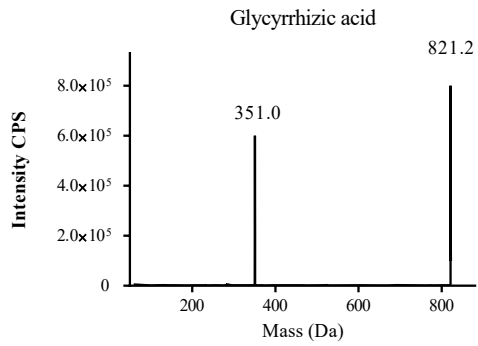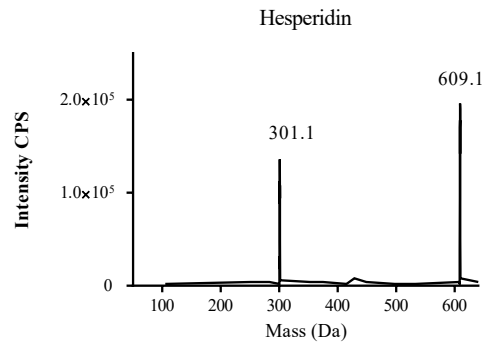

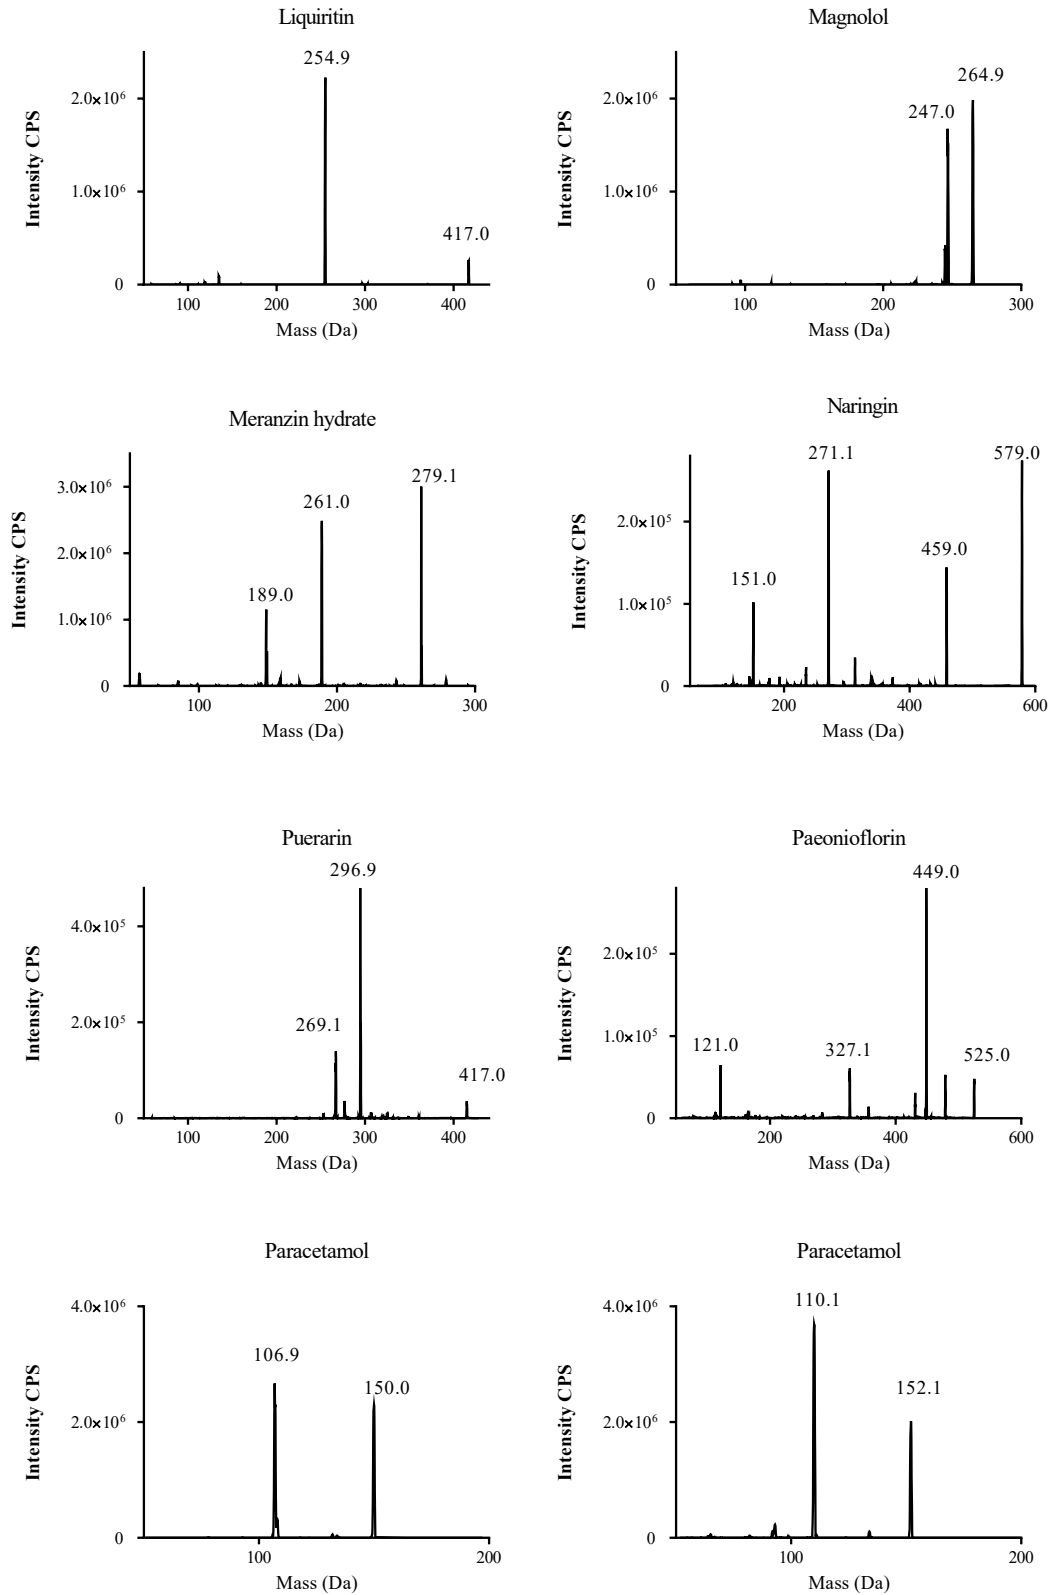

Figure. 1 The product spectra of the twelve analytes and Paracetamol (IS) in electrospray ionization mode by QQQ-MS/MS

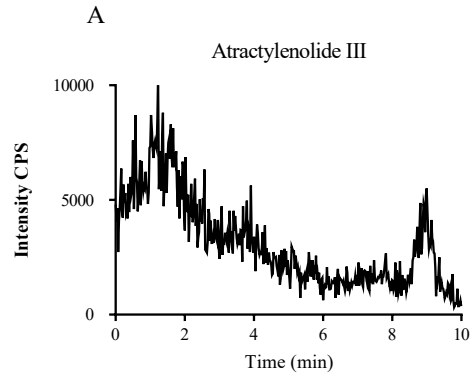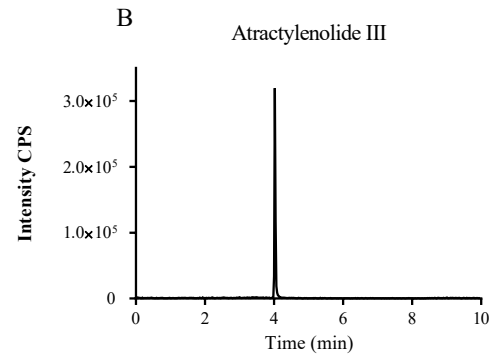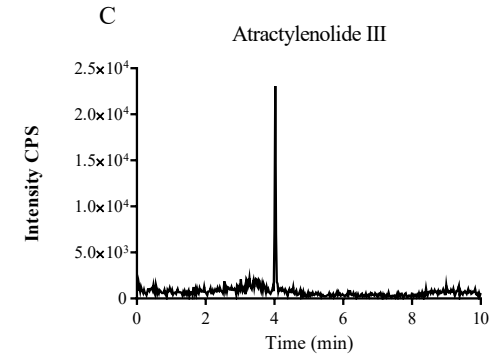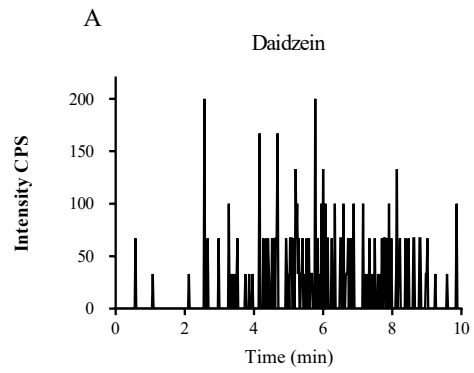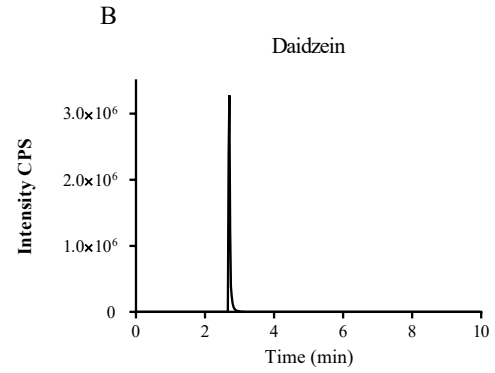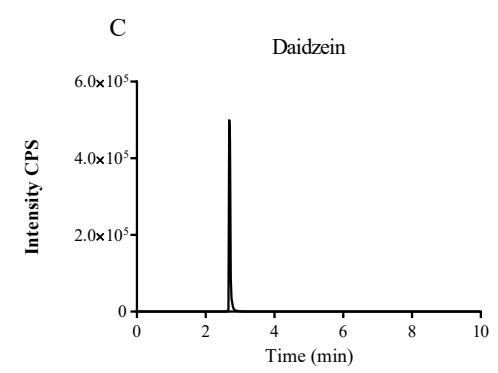

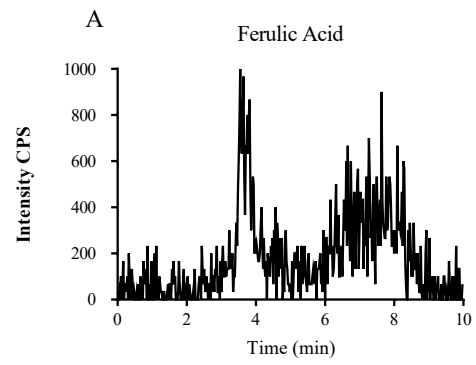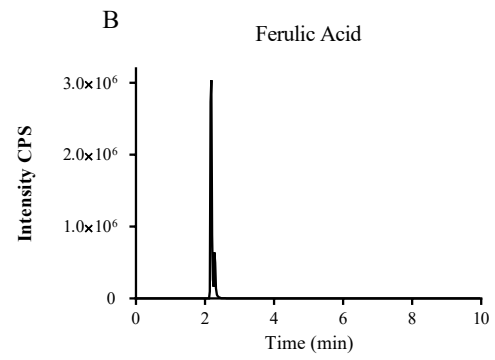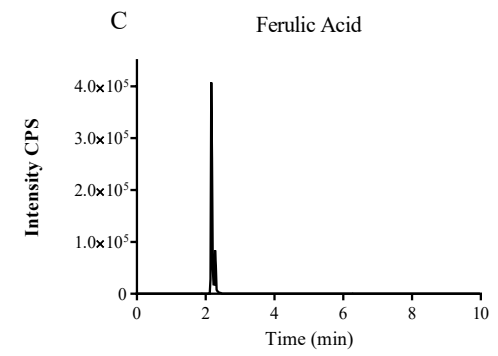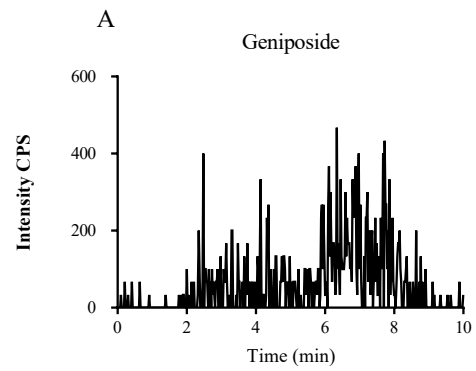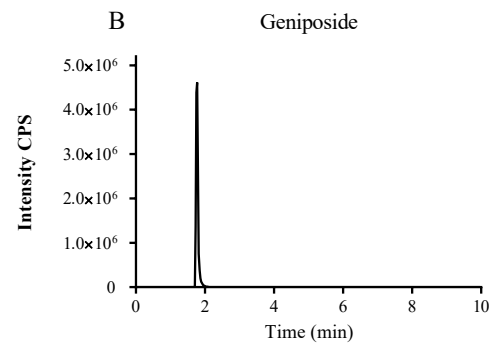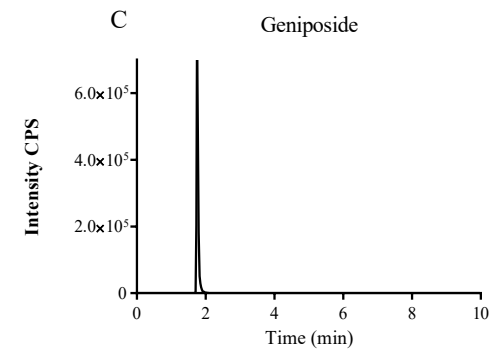

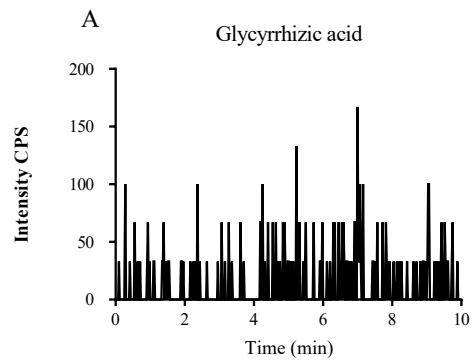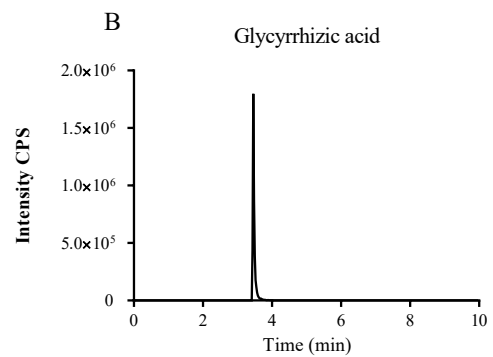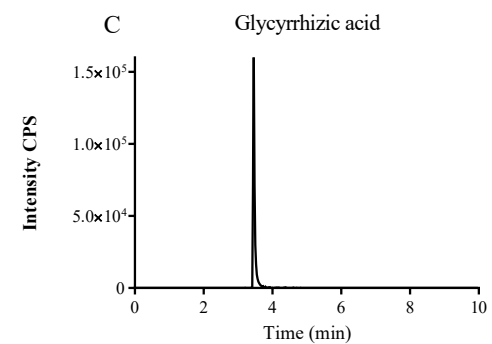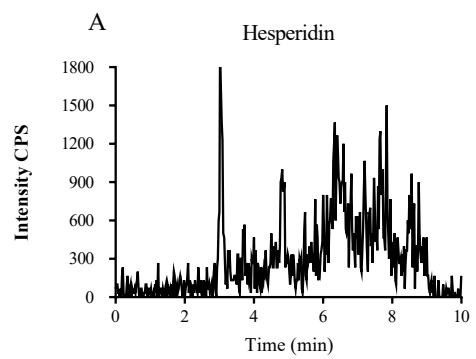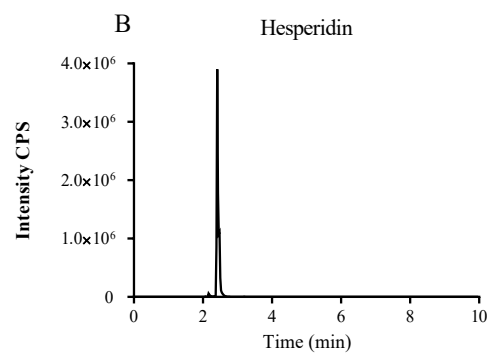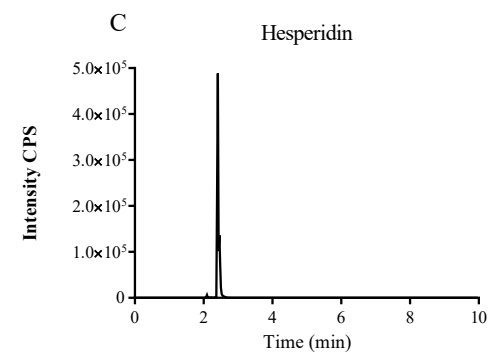

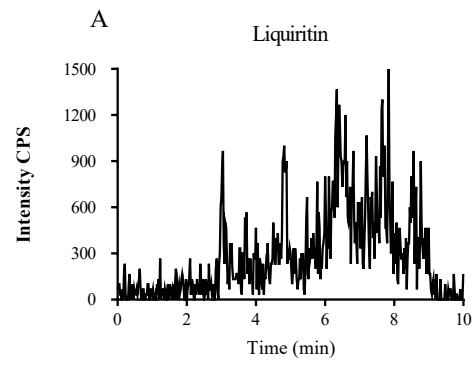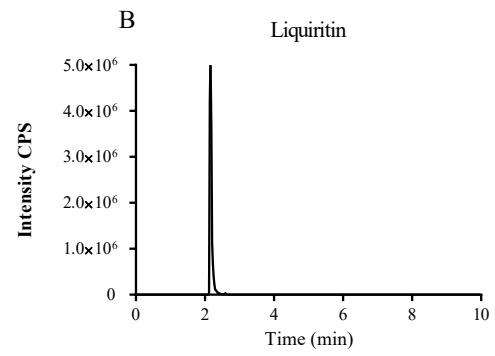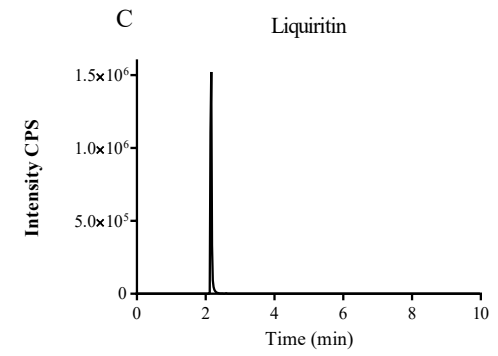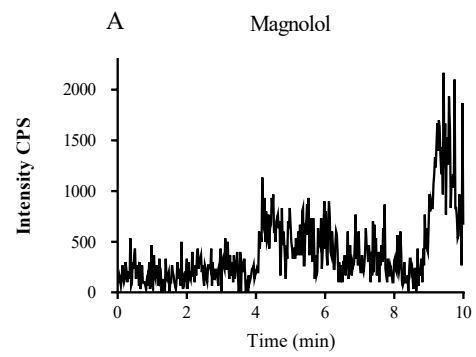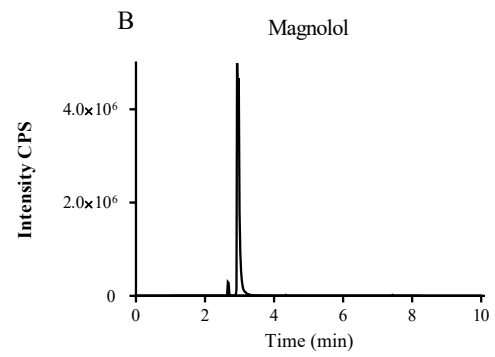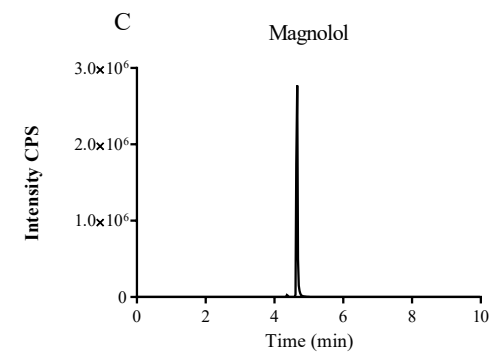

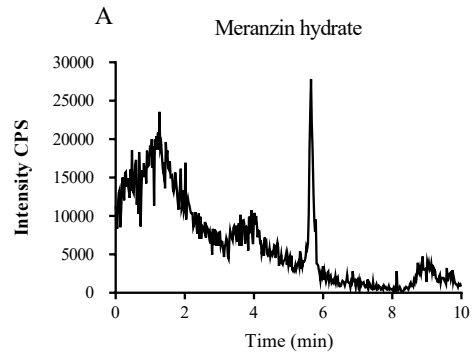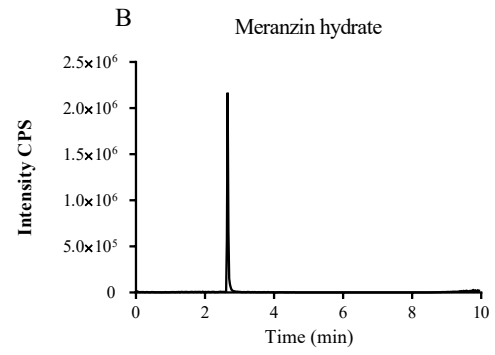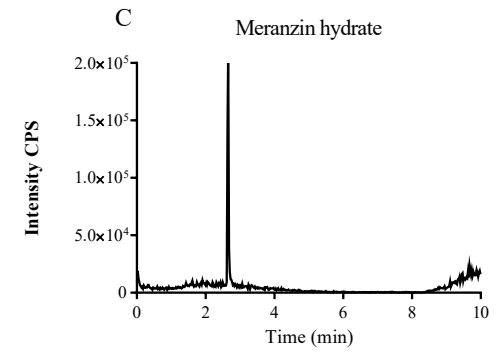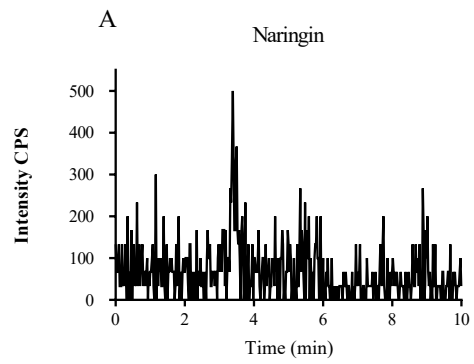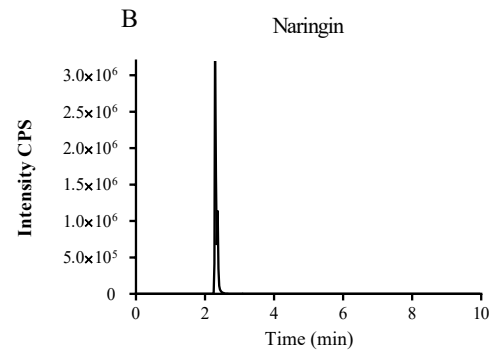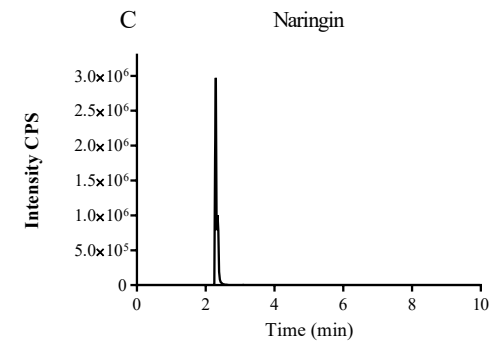



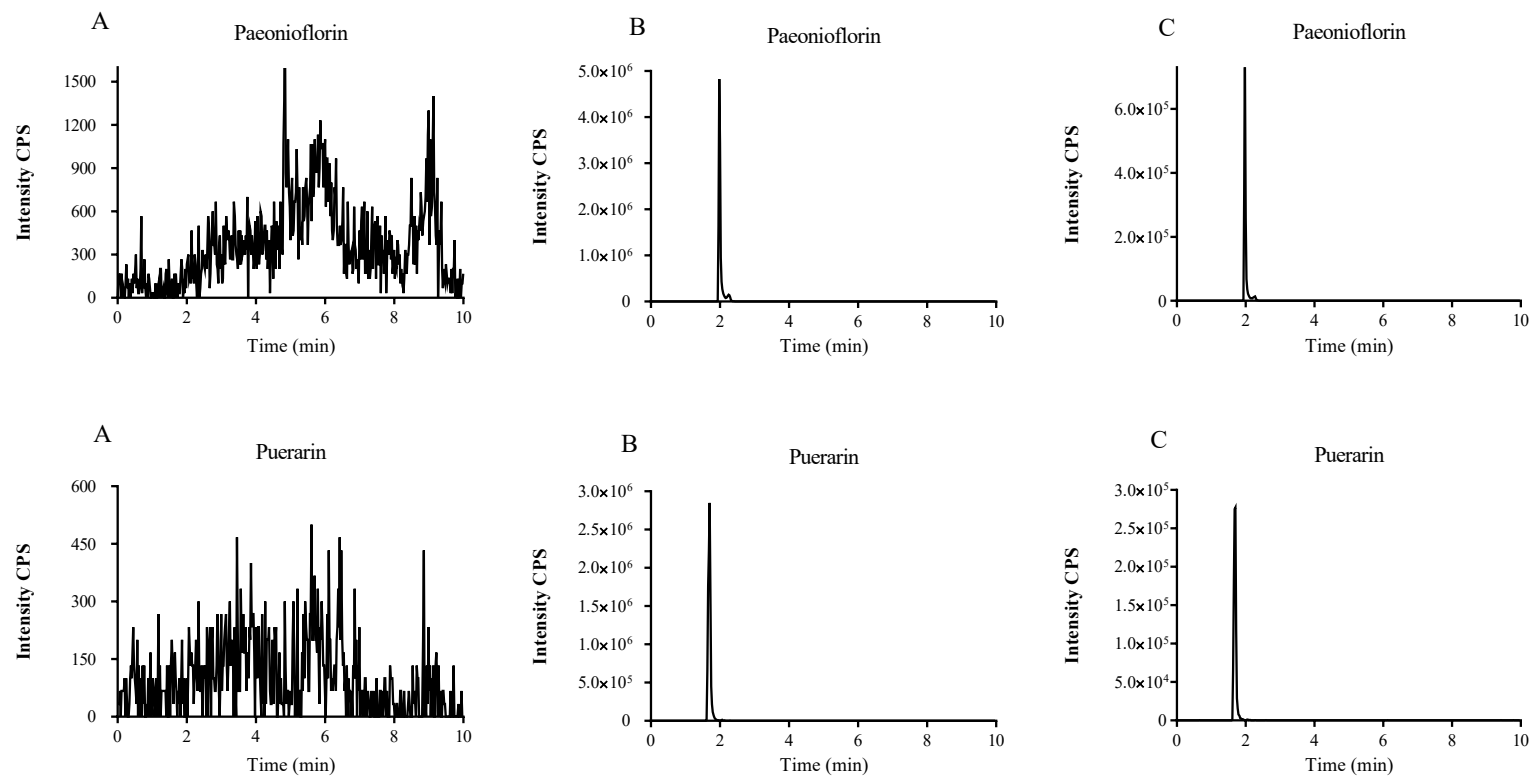

Figure 2 Typical MRM chromatograms of (A) blank plasma; (B) blank plasma sample spiked with twelve analytes and (C) Rat plasma samples at 30 min after oral administration of 30 g/kg XYSJW

Table.1 Comparison of behavior differences in force swimming test and open field test ( $\bar{x} \pm s$ , n =6)

| Group   | Immobility time(s) | Locomotion (times) | Rearing (times) | Grooming (times) |
|---------|--------------------|--------------------|-----------------|------------------|
| Control | 185.56±5.46        | 117.5±5.04         | 22.50±1.37      | 8.00±1.79        |
| Model   | 240.78±8.64**      | 105.50±10.71       | 13.70±2.94**    | 3.20±1.17**      |

\*\*P <0.01 vs Control

Table 2 UFLC-Q-TOF-MS/MS identification of XYSJW in negative mode

| No. | T <sub>R</sub> (min) | Identificaton               | Molecular Formula                                             | Ion species           | Theoretical Mass (Da) | Measured Mass (Da) | Mass Accuracy (ppm) | MS/MS Fragments Ions                  | Reference |
|-----|----------------------|-----------------------------|---------------------------------------------------------------|-----------------------|-----------------------|--------------------|---------------------|---------------------------------------|-----------|
| 1   | 0.57                 | Histidine                   | C <sub>6</sub> H <sub>9</sub> N <sub>3</sub> O <sub>2</sub>   | [M-H] <sup>-</sup>    | 154.0622              | 154.0635           | 8.4                 | 154.0637                              | 1, 2      |
| 2   | 0.6                  | Adenosine                   | C <sub>10</sub> H <sub>13</sub> N <sub>5</sub> O <sub>4</sub> | [M-H] <sup>-</sup>    | 266.0895              | 266.0886           | -3.3                | 266.0883                              | 1, 2      |
| 3   | 0.62                 | Methose                     | C <sub>6</sub> H <sub>12</sub> O <sub>6</sub>                 | [M-H] <sup>-</sup>    | 179.0561              | 179.0569           | 4.5                 | 179.0571                              | 3         |
| 4   | 0.63                 | α-D-Galactopyranuronic acid | C <sub>6</sub> H <sub>10</sub> O <sub>7</sub>                 | [M-H] <sup>-</sup>    | 193.0354              | 193.0363           | 4.6                 | 193.03627                             | 3         |
| 5   | 0.67                 | sucrose                     | C <sub>12</sub> H <sub>22</sub> O <sub>11</sub>               | [M-H] <sup>-</sup>    | 341.1089              | 341.1093           | 1.2                 | 179.0558, 119.0355, 113.0247, 89.0256 | 4,5       |
| 6   | 1.25                 | Riboflavin                  | C <sub>17</sub> H <sub>20</sub> N <sub>4</sub> O <sub>6</sub> | [M+COOH] <sup>-</sup> | 421.1354              | 421.1354           | 0                   | 375.1295, 345.1197, 165.0556,         | 3         |

|    |      |                                                                                                                       |                                                                 |                    |          |          |         |                                                      |        |
|----|------|-----------------------------------------------------------------------------------------------------------------------|-----------------------------------------------------------------|--------------------|----------|----------|---------|------------------------------------------------------|--------|
|    |      |                                                                                                                       |                                                                 |                    |          |          | 89.0259 |                                                      |        |
| 7  | 1.31 | Uridine                                                                                                               | C <sub>9</sub> H <sub>12</sub> N <sub>2</sub> O <sub>6</sub>    | [M-H] <sup>-</sup> | 243.0623 | 243.0630 | 3.1     | 169.0178, 124.0172                                   | 6      |
| 8  | 2.02 | Gallic acid                                                                                                           | C <sub>7</sub> H <sub>6</sub> O <sub>5</sub>                    | [M-H] <sup>-</sup> | 169.0143 | 169.0155 | 7.6     | 125.0233, 79.0202                                    | 4,5    |
| 9  | 2.1  | Guanosine                                                                                                             | C <sub>10</sub> H <sub>13</sub> N <sub>5</sub> O <sub>5</sub>   | [M-H] <sup>-</sup> | 282.0844 | 282.0847 | 1.2     | 150.0418, 133.0156, 108.0207                         | 1,2    |
| 10 | 2.32 | Adenosine cyclic 3',5'-<br>monophosphate                                                                              | C <sub>10</sub> H <sub>12</sub> N <sub>5</sub> O <sub>6</sub> P | [M-H] <sup>-</sup> | 328.0453 | 328.0455 | 0.9     | 134.0472, 78.9600                                    | 3      |
| 11 | 2.53 | Phenylalanine                                                                                                         | C <sub>9</sub> H <sub>11</sub> NO <sub>2</sub>                  | [M-H] <sup>-</sup> | 164.0717 | 164.0731 | 8.7     | 147.0441, 103.0554, 72.0108                          | 7      |
| 12 | 3.48 | Ethyl gallate                                                                                                         | C <sub>9</sub> H <sub>10</sub> O <sub>5</sub>                   | [M-H] <sup>-</sup> | 197.0456 | 197.0465 | 4.8     | 179.0350, 135.0451, 123.0453,<br>72.9959             | 4,5    |
| 13 | 4.32 | shanzhiside                                                                                                           | C <sub>16</sub> H <sub>24</sub> O <sub>11</sub>                 | [M-H] <sup>-</sup> | 391.1246 | 391.1247 | 0.4     | 229.0723, 59.0170                                    | 8      |
| 14 | 4.42 | Geniposidic acid                                                                                                      | C <sub>16</sub> H <sub>22</sub> O <sub>10</sub>                 | [M-H] <sup>-</sup> | 373.1140 | 373.1143 | 0.6     | 211.0602, 167.0701, 149.0601,<br>123.0447            | 8      |
| 15 | 5.34 | Gardenoside                                                                                                           | C <sub>17</sub> H <sub>24</sub> O <sub>11</sub>                 | [M-H] <sup>-</sup> | 403.1246 | 403.1248 | 0.5     | 241.0720, 127.0402                                   | 8      |
| 16 | 5.41 | D-(+)-Mannose                                                                                                         | C <sub>6</sub> H <sub>12</sub> O <sub>6</sub>                   | [M-H] <sup>-</sup> | 179.0561 | 179.0569 | 4.5     | 135.0401                                             | 6      |
| 17 | 5.47 | Licoricone                                                                                                            | C <sub>22</sub> H <sub>22</sub> O <sub>6</sub>                  | [M-H] <sup>-</sup> | 381.1344 | 381.1330 | -3.7    | 345.1584, 179.0562, 165.0923                         | 12     |
| 18 | 5.76 | [5-(Hexopyranosyloxy)-1-<br>oxo-2a,4a,5,7b-<br>tetrahydro-1H-2,6-<br>dioxacyclopenta[cd]inden-<br>4-yl]methyl acetate | C <sub>18</sub> H <sub>22</sub> O <sub>11</sub>                 | [M-H] <sup>-</sup> | 413.1089 | 413.1093 | 0.9     | 233.0450, 125.0243,                                  | 8      |
| 19 | 5.88 | Paeonol                                                                                                               | C <sub>9</sub> H <sub>10</sub> O <sub>3</sub>                   | [M-H] <sup>-</sup> | 165.0557 | 165.0568 | 6.2     | 121.0644, 119.0494, 90.346,<br>59.0165               | 18,19  |
| 20 | 5.92 | 3-Hydroxy-4-<br>methoxyacetophenone                                                                                   | C <sub>9</sub> H <sub>10</sub> O <sub>3</sub>                   | [M-H] <sup>-</sup> | 165.0557 | 165.0568 | 6.2     | 121.0644, 93.0346. 59.0165                           | 9,10   |
| 21 | 6.23 | Methyl gallate                                                                                                        | C <sub>8</sub> H <sub>8</sub> O <sub>5</sub>                    | [M-H] <sup>-</sup> | 183.0299 | 183.0306 | 4       | 124.0157, 78.0127                                    | 3,4    |
| 22 | 6.79 | Uralenneoside                                                                                                         | C <sub>12</sub> H <sub>14</sub> O <sub>8</sub>                  | [M-H] <sup>-</sup> | 285.0616 | 285.0619 | 1.1     | 153.0183, 109.0297                                   | 11, 12 |
| 23 | 6.98 | Catechin                                                                                                              | C <sub>15</sub> H <sub>14</sub> O <sub>6</sub>                  | [M-H] <sup>-</sup> | 289.0718 | 289.0722 | 1.6     | 245.08205, 203.0699,<br>159.0438, 123.0454, 109.0300 | 4,5    |
| 24 | 7.01 | Methyl nicotinate                                                                                                     | C <sub>7</sub> H <sub>7</sub> NO <sub>2</sub>                   | [M-H] <sup>-</sup> | 136.0465 | 136.0467 | 0.5     | 136.0429, 92.0523                                    | 3      |
| 25 | 7.22 | Phthalic acid                                                                                                         | C <sub>8</sub> H <sub>6</sub> O <sub>4</sub>                    | [M-H] <sup>-</sup> | 165.0193 | 165.0200 | 3.8     | 121.0280, 77.0403                                    | 1,2    |
| 26 | 7.38 | Chlorogenic acid                                                                                                      | C <sub>16</sub> H <sub>18</sub> O <sub>9</sub>                  | [M-H] <sup>-</sup> | 353.0878 | 353.0880 | 0.6     | 191.0552                                             | 8      |
| 27 | 7.61 | oxypaeoniflorin                                                                                                       | C <sub>23</sub> H <sub>28</sub> O <sub>12</sub>                 | [M-H] <sup>-</sup> | 495.1508 | 495.1504 | -0.9    | 465.1399, 333.0974, 165.0550,<br>137.0236            | 9,10   |
| 28 | 7.68 | Vanillic acid                                                                                                         | C <sub>8</sub> H <sub>8</sub> O <sub>4</sub>                    | [M-H] <sup>-</sup> | 167.0350 | 167.0357 | 4.4     | 152.0102, 108.0229, 65.0045                          | 9,10   |
| 29 | 8.59 | Narcissin                                                                                                             | C <sub>28</sub> H <sub>32</sub> O <sub>16</sub>                 | [M-H] <sup>-</sup> | 623.1618 | 623.1618 | 0       | 415.1030, 252.0423                                   | 13     |

|    |        |                                  |                                                 |                       |          |          |      |                                                            |        |
|----|--------|----------------------------------|-------------------------------------------------|-----------------------|----------|----------|------|------------------------------------------------------------|--------|
| 30 | 9      | Paeonoside                       | C <sub>15</sub> H <sub>20</sub> O <sub>8</sub>  | [M-H] <sup>-</sup>    | 327.1085 | 327.1088 | 0.9  | 147.0440, 103.0573                                         | 4,5    |
| 31 | 9.49   | Nuciferin                        | C <sub>19</sub> H <sub>21</sub> NO <sub>2</sub> | [M+COOH] <sup>-</sup> | 340.1543 | 340.1548 | 1.3  | 325.1322, 310.1082, 252.0422, 224.0475                     | 3      |
| 32 | 9.77   | Zizybeoside I                    | C <sub>19</sub> H <sub>28</sub> O <sub>11</sub> | [M+COOH] <sup>-</sup> | 477.1603 | 477.1608 | 1.1  | 183.0655, 168.0425, 161.0450, 153.0189                     | 3      |
| 33 | 10.47  | Genipin                          | C <sub>11</sub> H <sub>14</sub> O <sub>5</sub>  | [M-H] <sup>-</sup>    | 225.0769 | 225.0769 | 0.4  | 210.0494, 180.0431, 165.0181, 137.0228                     | 8      |
| 34 | 10.47  | Geniposide                       | C <sub>17</sub> H <sub>24</sub> O <sub>10</sub> | [M-H] <sup>-</sup>    | 387.1297 | 387.1293 | -0.9 | 355.1092, 225.0759, 207.0651, 147.0451, 123.0446, 101.0250 | 8      |
| 35 | 10.85  | Indole-3-acetic acid             | C <sub>10</sub> H <sub>9</sub> NO <sub>2</sub>  | [M-H] <sup>-</sup>    | 174.0561 | 174.0568 | 4.4  | 159.0317, 145.0526, 131.0379                               | 3      |
| 36 | 10.99  | Paeonolide                       | C <sub>20</sub> H <sub>28</sub> O <sub>12</sub> | +COOH                 | 505.1552 | 505.1556 | -11  | 293.0878, 165.0553, 150.0321                               | 11, 12 |
| 37 | 11.09  | Magnoflorine                     | C <sub>20</sub> H <sub>24</sub> NO <sub>4</sub> | +COOH                 | 387.1676 | 387.1660 | -4.2 | 207.1018, 89.0254, 59.0172                                 | 18     |
| 38 | 11.52  | Puerarin                         | C <sub>21</sub> H <sub>20</sub> O <sub>9</sub>  | [M-H] <sup>-</sup>    | 415.1035 | 415.1032 | -0.7 | 295.0594, 277.0594, 267.0647                               | 13     |
| 39 | 11.59  | Uralenol                         | C <sub>20</sub> H <sub>18</sub> O <sub>7</sub>  | [M+COOH] <sup>-</sup> | 415.1024 | 415.1032 | 1.9  | 295.0606, 277.0506, 267.0652,                              | 11, 12 |
| 40 | 11.67  | Neouralenol                      | C <sub>20</sub> H <sub>18</sub> O <sub>7</sub>  | [M+COOH] <sup>-</sup> | 415.1024 | 415.1032 | 1.9  | 295.0606, 277.0506, 267.0652,                              | 11, 12 |
| 41 | 11.694 | Albiflorin                       | C <sub>23</sub> H <sub>28</sub> O <sub>11</sub> | [M-H] <sup>-</sup>    | 479.1559 | 479.1554 | -1.1 | 449.1462, 327.1076, 121.0288                               | 4,5    |
| 42 | 12.23  | Apiopaeonoside                   | C <sub>20</sub> H <sub>28</sub> O <sub>12</sub> | [M+COOH] <sup>-</sup> | 505.1552 | 505.1556 | -1   | 459.1499, 293.0870, 165.0552                               | 9,10   |
| 43 | 13.21  | Zizyvoside I                     | C <sub>25</sub> H <sub>40</sub> O <sub>12</sub> | [M+COOH] <sup>-</sup> | 577.2491 | 577.2496 | 1    | 531.2471, 385.1844, 205.1223, 153.0923                     | 3      |
| 44 | 13.31  | albiflorin R1                    | C <sub>23</sub> H <sub>28</sub> O <sub>11</sub> | [M-H] <sup>-</sup>    | 479.1559 | 479.1554 | -1.1 | 449.1462, 327.1076, 121.0288                               | 4,5    |
| 45 | 13.49  | paeoniflorin                     | C <sub>23</sub> H <sub>28</sub> O <sub>11</sub> | [M-H] <sup>-</sup>    | 479.1559 | 479.1554 | -1.1 | 327.1109, 121.0289                                         | 9,10   |
| 46 | 14.18  | Nicotiflorin                     | C <sub>27</sub> H <sub>30</sub> O <sub>15</sub> | [M-H] <sup>-</sup>    | 593.1512 | 593.1510 | -0.4 | 503.1214, 473.1103, 383.0776, 353.0667, 297.0769           | 11, 12 |
| 47 | 14.95  | Galloxyloypaeoniflorin           | C <sub>30</sub> H <sub>32</sub> O <sub>16</sub> | [M-H] <sup>-</sup>    | 647.1618 | 647.1616 | -0.3 | 629.1552, 491.1221, 313.0577, 271.0465, 169.0142           | 9,10   |
| 48 | 16.11  | Catechin 5-O-β-D-glucopyranoside | C <sub>21</sub> H <sub>24</sub> O <sub>11</sub> | [M+COOH] <sup>-</sup> | 497.1290 | 497.1292 | 0.5  | 353.0879, 335.0974, 191.0550, 161.0444                     | 3      |
| 49 | 16.92  | Neoliquiritin                    | C <sub>21</sub> H <sub>22</sub> O <sub>9</sub>  | [M-H] <sup>-</sup>    | 417.1191 | 417.1190 | -0.3 | 255.0660, 135.0083, 119.0500                               | 11, 12 |
| 50 | 17.31  | Liquiritin                       | C <sub>21</sub> H <sub>22</sub> O <sub>9</sub>  | [M-H] <sup>-</sup>    | 417.1191 | 417.1190 | -0.3 | 255.0683, 135.0076, 119.0496                               | 12     |
| 51 | 18.31  | Rutin                            | C <sub>27</sub> H <sub>30</sub> O <sub>16</sub> | [M-H] <sup>-</sup>    | 609.1461 | 609.1455 | -1   | 301.0352, 300.0271, 271.0234, 255.0300                     | 13     |
| 52 | 18.38  | Rosoliside                       | C <sub>17</sub> H <sub>20</sub> O <sub>8</sub>  | [M+COOH] <sup>-</sup> | 397.1140 | 397.1142 | 0.9  | 235.0607, 217.0499, 191.0707, 176.0466, 161.0238           | 4,5    |
| 53 | 18.64  | Isoquercitrin                    | C <sub>21</sub> H <sub>20</sub> O <sub>12</sub> | [M-H] <sup>-</sup>    | 463.0882 | 463.0877 | -1.1 | 301.0349, 300.0272, 271.0238, 255.0295                     | 8      |

|    |        |                             |                                                 |                       |           |           |      |                                                  |        |
|----|--------|-----------------------------|-------------------------------------------------|-----------------------|-----------|-----------|------|--------------------------------------------------|--------|
| 54 | 18.7   | Isorhamnetin-3-O-glucoside  | C <sub>22</sub> H <sub>22</sub> O <sub>12</sub> | [M-H] <sup>-</sup>    | 477.1039  | 477.1033  | -1.2 | 431.2304, 341.0681, 161.0240                     | 13     |
| 55 | 18.88  | Galloylpaeoniflorin         | C <sub>30</sub> H <sub>32</sub> O <sub>15</sub> | [M-H] <sup>-</sup>    | 631.1668  | 631.1664  | -0.7 | 595.1684, 565.1423, 313.0564, 169.0141           | 5      |
| 56 | 20.15  | Azelaic acid                | C <sub>9</sub> H <sub>16</sub> O <sub>4</sub>   | [M-H] <sup>-</sup>    | 187.0976  | 187.0978  | 1    | 169.0860, 125.0962, 97.0660                      | 1.2    |
| 57 | 20.3   | Narirutin                   | C <sub>27</sub> H <sub>32</sub> O <sub>14</sub> | [M-H] <sup>-</sup>    | 579.1719  | 579.1714  | -0.9 | 295.0607, 271.0500, 151.0028                     | 3      |
| 58 | 20.8   | Mudanpioside H              | C <sub>30</sub> H <sub>32</sub> O <sub>14</sub> | [M-H] <sup>-</sup>    | 615.1719  | 615.1714  | -0.9 | 431.1347, 281.0659, 137.0236                     | 9,10   |
| 59 | 20.82  | Astragalin                  | C <sub>21</sub> H <sub>20</sub> O <sub>11</sub> | [M-H] <sup>-</sup>    | 447.0933  | 447.0925  | -1.8 | 285.0392, 255.0295, 227.0340                     | 4,5    |
| 60 | 21.2   | Naringin                    | C <sub>27</sub> H <sub>32</sub> O <sub>14</sub> | [M-H] <sup>-</sup>    | 579.1719  | 579.1714  | -0.9 | 271.0596, 151.0028                               | 15, 16 |
| 61 | 21.85  | Daidzein-4,7-diglucoside    | C <sub>27</sub> H <sub>30</sub> O <sub>14</sub> | [M-H] <sup>-</sup>    | 577.1563  | 577.1558  | -0.8 | 577.1558, 269.0443                               | 14     |
| 62 | 21.973 | Paeoniflorin                | C <sub>23</sub> H <sub>28</sub> O <sub>11</sub> | [M-H] <sup>-</sup>    | 479.1559  | 479.1554  | -1.1 | 121.0295                                         | 4,5    |
| 63 | 22.11  | Hesperidin                  | C <sub>28</sub> H <sub>34</sub> O <sub>15</sub> | [M-H] <sup>-</sup>    | 609.1825  | 609.1819  | -1   | 609.1521, 301.0692                               | 15, 16 |
| 64 | 22.27  | Rosmarinic acid             | C <sub>18</sub> H <sub>16</sub> O <sub>8</sub>  | [M-H] <sup>-</sup>    | 359.0772  | 359.0767  | -1.4 | 197.0445, 179.0341, 161.0234, 133.0287           | 7      |
| 65 | 22.34  | Spinosin                    | C <sub>28</sub> H <sub>32</sub> O <sub>15</sub> | [M-H] <sup>-</sup>    | 607.1668  | 607.1663  | -0.9 | 229.0546, 284.0315                               | 3      |
| 66 | 22.44  | Isochlorogenic acid C       | C <sub>25</sub> H <sub>24</sub> O <sub>12</sub> | [M-H] <sup>-</sup>    | 515.1195  | 515.1185  | -1.9 | 353.0876, 191.0558, 179.0347, 173.0452, 135.0444 | 8      |
| 67 | 22.71  | 3,5-O-dicaffeoylquinic acid | C <sub>25</sub> H <sub>24</sub> O <sub>12</sub> | [M-H] <sup>-</sup>    | 515.1195  | 515.1185  | -1.9 | 353.0871, 335.745, 191.0554, 179.0340, 135.0442  | 8      |
| 68 | 22.82  | Bupleuroside XII            | C <sub>48</sub> H <sub>78</sub> O <sub>19</sub> | [M+COOH] <sup>-</sup> | 1003.5108 | 1003.5118 | 0.9  | 957.5811, 811.4534, 651.2732                     | 13     |
| 69 | 23.01  | Neohesperidin               | C <sub>28</sub> H <sub>34</sub> O <sub>15</sub> | [M-H] <sup>-</sup>    | 609.1825  | 609.1819  | -1   | 489.1402, 343.0812, 301.0691                     | 15, 16 |
| 70 | 23.05  | Myristicin                  | C <sub>11</sub> H <sub>12</sub> O <sub>3</sub>  | [M+COOH] <sup>-</sup> | 237.0758  | 237.0768  | 4.4  | 193.0856, 108.0211                               | 3      |
| 71 | 23.57  | 4',7-Dihydroxyflavone       | C <sub>15</sub> H <sub>10</sub> O <sub>4</sub>  | [M-H] <sup>-</sup>    | 253.0506  | 253.0510  | 1.5  | 223.0398, 133.0277, 117.0341                     | 8      |
| 72 | 23.8   | Isoliquiritigenin           | C <sub>15</sub> H <sub>12</sub> O <sub>4</sub>  | [M-H] <sup>-</sup>    | 255.0663  | 255.0665  | 0.4  | 135.0078, 119.0500, 91.0195                      | 11, 12 |
| 73 | 23.84  | Ononin                      | C <sub>22</sub> H <sub>22</sub> O <sub>9</sub>  | [M+COOH] <sup>-</sup> | 475.1235  | 475.1238  | 0.7  | 267.0658, 252.0422                               | 14     |
| 74 | 23.95  | Daidzein                    | C <sub>15</sub> H <sub>10</sub> O <sub>4</sub>  | [M-H] <sup>-</sup>    | 253.0506  | 253.0510  | 1.5  | 233.0388, 208.0522                               | 14     |
| 75 | 24.05  | Chrysin                     | C <sub>15</sub> H <sub>10</sub> O <sub>4</sub>  | [M-H] <sup>-</sup>    | 253.0506  | 253.0510  | 1.5  | 225.0542, 223.0388, 195.0444                     | 8      |
| 76 | 24.06  | Isoliquiritin               | C <sub>21</sub> H <sub>22</sub> O <sub>9</sub>  | [M-H] <sup>-</sup>    | 417.1191  | 417.1190  | -0.3 | 255.0643, 148.0158, 135.0079, 119.0496           | 11, 12 |
| 77 | 24.32  | Vulgarin                    | C <sub>15</sub> H <sub>20</sub> O <sub>4</sub>  | [M-H] <sup>-</sup>    | 263.1289  | 263.1291  | 0.9  | 219.1378, 204.1157, 203.1079, 154.0834           | 3      |
| 78 | 25.58  | Sebacic acid                | C <sub>10</sub> H <sub>18</sub> O <sub>4</sub>  | [M-H] <sup>-</sup>    | 201.1132  | 201.1134  | 1    | 183.1003, 139.1115                               | 1,2    |
| 79 | 26.2   | kaempferol                  | C <sub>15</sub> H <sub>10</sub> O <sub>6</sub>  | [M-H] <sup>-</sup>    | 285.0405  | 285.0403  | -0.5 | 175.0384, 133.0296                               | 4,5    |

|     |        |                             |                                                  |                       |           |           |      |                                                  |        |
|-----|--------|-----------------------------|--------------------------------------------------|-----------------------|-----------|-----------|------|--------------------------------------------------|--------|
| 80  | 26.39  | Sacranoside A               | C <sub>21</sub> H <sub>34</sub> O <sub>10</sub>  | [M-H] <sup>-</sup>    | 445.2079  | 445.2076  | -0.7 | 293.0879, 141.0886                               | 4,5    |
| 81  | 26.69  | Marmin                      | C <sub>19</sub> H <sub>24</sub> O <sub>5</sub>   | [M-H] <sup>-</sup>    | 331.1551  | 331.1549  | -0.7 | 331.1547, 115.0702                               | 15, 16 |
| 82  | 27.3   | Nornuciferine               | C <sub>18</sub> H <sub>19</sub> NO <sub>2</sub>  | [M+COOH] <sup>-</sup> | 326.1387  | 326.1393  | 1.8  | 311.1170, 204.0652, 148.0513, 135.0446           | 3      |
| 83  | 28.66  | Naringenin                  | C <sub>15</sub> H <sub>12</sub> O <sub>5</sub>   | [M-H] <sup>-</sup>    | 271.0612  | 271.0613  | 0.3  | 187.0391, 177.0184, 151.0028, 119.0499           | 15, 16 |
| 84  | 29.01  | Genistein                   | C <sub>15</sub> H <sub>10</sub> O <sub>5</sub>   | [M-H] <sup>-</sup>    | 269.0456  | 269.0457  | 0.6  | 133.0296                                         | 14     |
| 85  | 29.01  | 7,8,4'-trihydroxyisoflavone | C <sub>15</sub> H <sub>10</sub> O <sub>5</sub>   | [M-H] <sup>-</sup>    | 269.0456  | 269.0457  | 0.6  | 269.0453, 133.0296                               | 14     |
| 86  | 29.76  | 6-gingediol-3-acetate       | C <sub>19</sub> H <sub>30</sub> O <sub>5</sub>   | [M-H] <sup>-</sup>    | 337.2021  | 337.2014  | -1.9 | 337.2021                                         | 18     |
| 87  | 29.86  | Coumesterol                 | C <sub>15</sub> H <sub>8</sub> O <sub>5</sub>    | [M-H] <sup>-</sup>    | 267.0299  | 267.0296  | -1   | 267.0964, 195.0442                               | 3      |
| 88  | 29.91  | 6-gingediol-5-acetate       | C <sub>19</sub> H <sub>30</sub> O <sub>5</sub>   | [M-H] <sup>-</sup>    | 337.2021  | 337.2014  | -1.9 | 337.2026                                         | 18     |
| 89  | 30.41  | Paeonidanin                 | C <sub>25</sub> H <sub>32</sub> O <sub>10</sub>  | [M-H] <sup>-</sup>    | 491.1923  | 491.1913  | -1.9 | 413.1603, 353.1386, 217.0865                     | 9,10   |
| 90  | 30.73  | Hesperetin                  | C <sub>16</sub> H <sub>14</sub> O <sub>6</sub>   | [M-H] <sup>-</sup>    | 301.0718  | 301.0717  | -0.3 | 286.0469, 199.0386, 164.0106, 151.0026, 136.0157 | 15, 16 |
| 91  | 30.9   | benzoylpaeoniflorin         | C <sub>30</sub> H <sub>32</sub> O <sub>12</sub>  | [M-H] <sup>-</sup>    | 583.1821  | 583.1822  | 0.2  | 553.1648, 121.0266                               | 9,10   |
| 92  | 31.52  | Isorhamnetin                | C <sub>16</sub> H <sub>12</sub> O <sub>7</sub>   | [M-H] <sup>-</sup>    | 315.0510  | 315.0507  | -1   | 315.0508                                         | 13     |
| 93  | 31.52  | Sexangularetin              | C <sub>16</sub> H <sub>12</sub> O <sub>7</sub>   | [M-H] <sup>-</sup>    | 315.0510  | 315.0507  | -1   | 315.0509                                         | 18     |
| 94  | 33.54  | 6-gingesulfonic acid        | C <sub>17</sub> H <sub>26</sub> O <sub>6</sub> S | [M-H] <sup>-</sup>    | 357.1377  | 357.1367  | -3   | 275.1635, 139.1115, 80.9661                      | 18     |
| 95  | 33.596 | Liquiritigenin              | C <sub>15</sub> H <sub>12</sub> O <sub>4</sub>   | [M-H] <sup>-</sup>    | 255.0663  | 255.0663  | 0.2  | 135.0092, 119.0486                               | 11, 12 |
| 96  | 34.09  | Formonetin                  | C <sub>16</sub> H <sub>12</sub> O <sub>4</sub>   | [M-H] <sup>-</sup>    | 267.0663  | 267.0660  | -1.1 | 252.0409, 233.0375, 195.0430                     | 14     |
| 97  | 34.54  | Zizyphus saponin III        | C <sub>52</sub> H <sub>84</sub> O <sub>21</sub>  | [M-H] <sup>-</sup>    | 1043.5432 | 1043.5409 | -2.2 | 1043.5408                                        | 3      |
| 98  | 35.64  | Gardenone                   | C <sub>12</sub> H <sub>20</sub> O <sub>3</sub>   | [M-H] <sup>-</sup>    | 211.1340  | 211.1330  | -4.4 | 211.1351                                         | 6      |
| 99  | 39.65  | Saikosaponin B3             | C <sub>43</sub> H <sub>72</sub> O <sub>14</sub>  | [M+COOH] <sup>-</sup> | 857.4893  | 857.4896  | 0.3  | 811.4869, 649.4257                               | 13     |
| 100 | 39.72  | 3'-Methoxydaidzein          | C <sub>16</sub> H <sub>12</sub> O <sub>5</sub>   | [M-H] <sup>-</sup>    | 283.0612  | 283.0614  | 0.6  | 268.0359, 211.0378                               | 14     |
| 101 | 39.92  | Nortrachelogenin            | C <sub>20</sub> H <sub>22</sub> O <sub>7</sub>   | [M-H] <sup>-</sup>    | 373.1293  | 373.1308  | 4    | 273.0432, 193.0861, 79.9587                      | 13     |
| 102 | 39.94  | 6-Gingerol                  | C <sub>17</sub> H <sub>26</sub> O <sub>4</sub>   | [M-H] <sup>-</sup>    | 293.1758  | 293.1755  | -1.1 | 99.0800, 57.0366                                 | 18     |
| 103 | 40.53  | Imperatorin                 | C <sub>16</sub> H <sub>14</sub> O <sub>4</sub>   | [M-H] <sup>-</sup>    | 269.0819  | 269.0819  | -0.2 | 269.0808, 152.0105                               | 8      |
| 104 | 40.53  | isoimperatorin              | C <sub>16</sub> H <sub>14</sub> O <sub>4</sub>   | [M-H] <sup>-</sup>    | 269.0819  | 269.0819  | -0.2 | 269.08058, 152.0105                              | 8      |
| 105 | 40.65  | Glycyrrhizic acid           | C <sub>42</sub> H <sub>62</sub> O <sub>16</sub>  | [M-H] <sup>-</sup>    | 821.3965  | 821.3955  | -1.2 | 423,0104, 405.0689                               | 11, 12 |
| 106 | 41.03  | Saikosaponin B4             | C <sub>43</sub> H <sub>72</sub> O <sub>14</sub>  | [M+COOH] <sup>-</sup> | 857.4893  | 857.4896  | 0.3  | 811.4866, 649.4254                               | 13     |
| 107 | 41.84  | Saikosaponin A              | C <sub>42</sub> H <sub>68</sub> O <sub>13</sub>  | [M-H] <sup>-</sup>    | 779.4587  | 779.4581  | -0.8 | 617.4098                                         | 13     |
| 108 | 42.11  | Saikosaponin D              | C <sub>42</sub> H <sub>68</sub> O <sub>13</sub>  | [M-H] <sup>-</sup>    | 779.4587  | 779.4572  | -1.6 | 617.4074                                         | 13     |
| 109 | 42.21  | Sigmoidin B                 | C <sub>20</sub> H <sub>20</sub> O <sub>6</sub>   | [M-H] <sup>-</sup>    | 355.1187  | 355.1185  | -0.6 | 229.0866, 125.0239                               | 11, 12 |

|     |        |                          |                                                 |                       |          |          |       |                                               |        |
|-----|--------|--------------------------|-------------------------------------------------|-----------------------|----------|----------|-------|-----------------------------------------------|--------|
| 110 | 42.26  | Zizyphus saponin II      | C <sub>47</sub> H <sub>76</sub> O <sub>17</sub> | [M-H] <sup>-</sup>    | 911.5010 | 911.4991 | -2    | 911.5096                                      | 17     |
| 111 | 42.41  | Bupleuroside I           | C <sub>48</sub> H <sub>78</sub> O <sub>18</sub> | [M-H] <sup>-</sup>    | 941.5115 | 941.5098 | -1.8  | 941.5181                                      | 13     |
| 112 | 42.41  | Jujubasaponin V          | C <sub>48</sub> H <sub>78</sub> O <sub>18</sub> | [M+COOH] <sup>-</sup> | 987.5159 | 987.5151 | -0.8  | 941.5153                                      | 3      |
| 113 | 42.58  | Isokaerophyllin          | C <sub>21</sub> H <sub>20</sub> O <sub>6</sub>  | [M-H] <sup>-</sup>    | 367.1187 | 367.1177 | -2.9  | 309.0398, 298.0398,<br>281.045,171.0181       | 13     |
| 114 | 42.58  | Curcumin                 | C <sub>21</sub> H <sub>20</sub> O <sub>6</sub>  | [M-H] <sup>-</sup>    | 367.1187 | 367.1177 | -2.9  | 309.0391,297.392, 201.0174                    | 18     |
| 115 | 43.01  | Jujubasaponin VI         | C <sub>42</sub> H <sub>68</sub> O <sub>14</sub> | [M-H] <sup>-</sup>    | 795.4536 | 795.4521 | -2    | 795.4777, 311.2278                            | 3      |
| 116 | 43.033 | Saikosaponin B1          | C <sub>42</sub> H <sub>68</sub> O <sub>13</sub> | [M-H] <sup>-</sup>    | 779.4587 | 779.4569 | -0.8  | 617.4092                                      | 13     |
| 117 | 43.06  | Zizyphus saponin I       | C <sub>47</sub> H <sub>76</sub> O <sub>17</sub> | [M-H] <sup>-</sup>    | 911.5010 | 911.4991 | -2    | 911.5013                                      | 3      |
| 118 | 43.374 | Saikosaponin B2          | C <sub>42</sub> H <sub>68</sub> O <sub>13</sub> | [M-H] <sup>-</sup>    | 779.4587 | 779.4581 | -0.8  | 617.4093                                      | 13     |
| 119 | 43.42  | jujubasaponin IV         | C <sub>48</sub> H <sub>78</sub> O <sub>18</sub> | [M-H] <sup>-</sup>    | 941.5115 | 941.5098 | -1.8  | 941.5194                                      | 3      |
| 120 | 43.43  | Saikosaponin C           | C <sub>48</sub> H <sub>78</sub> O <sub>17</sub> | [M-H] <sup>-</sup>    | 925.5166 | 925.5153 | -1.5  | 925.5182, 907.5061                            | 13     |
| 121 | 43.44  | Isogingerenone-B         | C <sub>22</sub> H <sub>26</sub> O <sub>6</sub>  | [M-H] <sup>-</sup>    | 385.1657 | 385.1671 | 3.6   | 303.1970, 167.1423, 80.9659                   | 18     |
| 122 | 43.63  | Bupleuroside X           | C <sub>48</sub> H <sub>78</sub> O <sub>18</sub> | [M-H] <sup>-</sup>    | 941.5115 | 941.5099 | -1.7  | 895.3392, 941.5095                            | 13     |
| 123 | 44.06  | Saikosaponin E           | C <sub>42</sub> H <sub>68</sub> O <sub>12</sub> | [M-H] <sup>-</sup>    | 763.4638 | 763.4624 | -1.9  | 601.3964, 161.0418, 101.0233                  | 13     |
| 124 | 44.51  | saikosaponin H           | C <sub>48</sub> H <sub>78</sub> O <sub>17</sub> | [M-H] <sup>-</sup>    | 925.5166 | 925.5159 | -1.2  | 925.5161                                      | 13     |
| 125 | 44.61  | Bupleuroside VII         | C <sub>48</sub> H <sub>78</sub> O <sub>18</sub> | [M-H] <sup>-</sup>    | 941.5115 | 941.5101 | -0.9  | 941.5116                                      | 13     |
| 126 | 45.11  | poricoic acid A          | C <sub>31</sub> H <sub>46</sub> O <sub>5</sub>  | [M-H] <sup>-</sup>    | 497.3273 | 497.3250 | -4.5  | 497.3251, 419.2971                            | 19, 20 |
| 127 | 45.2   | Glycyrol                 | C <sub>21</sub> H <sub>18</sub> O <sub>6</sub>  | [M-H] <sup>-</sup>    | 365.1031 | 365.1017 | -3.9  | 365.1023                                      | 19, 20 |
| 128 | 46.1   | Honokiol                 | C <sub>18</sub> H <sub>18</sub> O <sub>2</sub>  | [M-H] <sup>-</sup>    | 265.1234 | 265.1229 | -2.2  | 249.0910, 223.751, 197.0597                   | 17     |
| 129 | 47.48  | Obovatol                 | C <sub>18</sub> H <sub>18</sub> O <sub>3</sub>  | [M-H] <sup>-</sup>    | 281.1183 | 281.1177 | -2.2  | 281.1166, 164.0468                            | 17     |
| 130 | 47.63  | Magnolol                 | C <sub>18</sub> H <sub>18</sub> O <sub>2</sub>  | [M-H] <sup>-</sup>    | 265.1234 | 265.1227 | -2.6  | 247.110[17, 18]45.0952,<br>243.0803, 223.0747 | 17     |
| 131 | 47.65  | vomifoliol               | C <sub>13</sub> H <sub>20</sub> O <sub>3</sub>  | [M+COOH] <sup>-</sup> | 269.1384 | 269.1329 | -20.4 | 251.1964, 171.0989                            | 17     |
| 132 | 48.1   | Iso-Glycyrol             | C <sub>21</sub> H <sub>18</sub> O <sub>6</sub>  | [M-H] <sup>-</sup>    | 365.1031 | 365.1029 | -0.9  | 365.1028                                      | 11, 12 |
| 133 | 48.26  | poricoic acid C          | C <sub>31</sub> H <sub>46</sub> O <sub>4</sub>  | [M-H] <sup>-</sup>    | 481.3323 | 481.3291 | -6.8  | 466.3084, 253.2181                            | 19, 20 |
| 134 | 48.37  | Poricoic acid B          | C <sub>30</sub> H <sub>44</sub> O <sub>5</sub>  | [M-H] <sup>-</sup>    | 483.3116 | 483.3087 | -6    | 409.2744, 255.2365                            | 19, 20 |
| 135 | 48.41  | 6-Gingerdione            | C <sub>17</sub> H <sub>24</sub> O <sub>4</sub>  | [M-H] <sup>-</sup>    | 291.1602 | 291.1592 | -3.5  | 231.1362, 59.0167                             | 19, 20 |
| 136 | 48.54  | 2α-hydroxyoleanolic acid | C <sub>30</sub> H <sub>48</sub> O <sub>4</sub>  | [M+COOH] <sup>-</sup> | 517.3524 | 517.3507 | -3.3  | 471.3489                                      | 3      |
| 137 | 48.58  | Jujubogenin              | C <sub>30</sub> H <sub>48</sub> O <sub>4</sub>  | [M+COOH] <sup>-</sup> | 517.3524 | 517.3506 | -3.3  | 471.3461                                      | 3      |
| 138 | 48.61  | 3-Epicorosolic acid      | C <sub>30</sub> H <sub>48</sub> O <sub>4</sub>  | [M+COOH] <sup>-</sup> | 517.3524 | 517.3506 | -3.3  | 471.3492                                      | 3      |
| 139 | 48.91  | Tumulolic acid           | C <sub>31</sub> H <sub>50</sub> O <sub>4</sub>  | [M-H] <sup>-</sup>    | 485.3636 | 485.3604 | -6.6  | 485.3637, 419.0955                            | 19, 20 |
| 140 | 49.20  | Maslinic acid            | C <sub>30</sub> H <sub>48</sub> O <sub>4</sub>  | [M+COOH] <sup>-</sup> | 517.3524 | 517.3506 | -3.3  | 471.3487                                      | 3      |

|     |       |                          |                                                |                       |          |          |      |                                           |        |
|-----|-------|--------------------------|------------------------------------------------|-----------------------|----------|----------|------|-------------------------------------------|--------|
| 141 | 49.57 | Glycyrrhetic acid        | C <sub>30</sub> H <sub>46</sub> O <sub>4</sub> | [M-H] <sup>-</sup>    | 469.3323 | 469.3297 | -5.6 | 469.329, 425.3416                         | 11, 12 |
| 142 | 50.94 | dehydroeburicoic acid    | C <sub>31</sub> H <sub>48</sub> O <sub>3</sub> | [M+COOH] <sup>-</sup> | 513.3575 | 513.3560 | -2.9 | 495.3290, 467. 2960                       | 19, 20 |
| 143 | 51.23 | Mairin                   | C <sub>30</sub> H <sub>48</sub> O <sub>3</sub> | [M-H] <sup>-</sup>    | 455.3531 | 455.3500 | -6.7 | 455.3509                                  | 3      |
| 144 | 51.4  | pachymic acid            | C <sub>33</sub> H <sub>52</sub> O <sub>5</sub> | [M-H] <sup>-</sup>    | 527.3742 | 527.3711 | -5.9 | 527.3729                                  | 19, 20 |
| 145 | 51.55 | Oleanolic acid           | C <sub>30</sub> H <sub>48</sub> O <sub>3</sub> | [M-H] <sup>-</sup>    | 455.3531 | 455.3499 | -6.8 | 455.3509                                  | 3      |
| 146 | 52.04 | Alfalone                 | C <sub>17</sub> H <sub>14</sub> O <sub>5</sub> | [M+COOH] <sup>-</sup> | 343.0804 | 453.3343 | -7   | 328.0564, 313.0337, 259.0607,<br>131.0634 | 3      |
| 147 | 52.08 | Mudanpinoic acid A       | C <sub>30</sub> H <sub>46</sub> O <sub>3</sub> | [M-H] <sup>-</sup>    | 453.3374 | 453.3343 | -7   | 453.3376                                  | 9,10   |
| 148 | 52.1  | Dehydrotrametenolic acid | C <sub>30</sub> H <sub>46</sub> O <sub>3</sub> | [M-H] <sup>-</sup>    | 453.3374 | 453.3343 | -7   | 453.334                                   | 18     |
| 149 | 52.15 | Linoleic acid            | C <sub>18</sub> H <sub>32</sub> O <sub>2</sub> | [M-H] <sup>-</sup>    | 279.2330 | 279.2318 | -4.1 | 279.2299                                  | 8      |
| 150 | 52.23 | Trametenolic acid        | C <sub>30</sub> H <sub>48</sub> O <sub>3</sub> | [M-H] <sup>-</sup>    | 455.3531 | 455.3529 | -1.7 | 455.3502                                  | 19, 20 |
| 151 | 55.93 | Sitogluside              | C <sub>35</sub> H <sub>60</sub> O <sub>6</sub> | [M+COOH] <sup>-</sup> | 621.4361 | 621.4336 | -4.1 | 621.4359                                  | 3      |

Table 3 UFLC-Q-TOF-MS/MS identification of XYSJW in positive mode

| No. | T <sub>R</sub><br>(min) | Identificaton | Molecular<br>Formula                                            | Ion<br>species     | Theoretical<br>Mass (Da) | Measured<br>Mass (Da) | Mass<br>Accuracy<br>(ppm) | MS/MS Fragments Ions                        | reference |
|-----|-------------------------|---------------|-----------------------------------------------------------------|--------------------|--------------------------|-----------------------|---------------------------|---------------------------------------------|-----------|
| 152 | 0.62                    | L-(+)-Valine  | C <sub>5</sub> H <sub>11</sub> NO <sub>2</sub>                  | [M+H] <sup>+</sup> | 118.0863                 | 118.0862              | -0.6                      | 118.0862, 72.9382                           | 1.2       |
| 153 | 0.63                    | Glutamine     | C <sub>5</sub> H <sub>9</sub> NO <sub>4</sub>                   | [M+H] <sup>+</sup> | 148.0604                 | 148.0605              | 0.4                       | 148.0606                                    | 6         |
| 154 | 0.63                    | L-Proline     | C <sub>5</sub> H <sub>9</sub> NO <sub>2</sub>                   | [M+H] <sup>+</sup> | 116.0706                 | 116.0706              | -0.1                      | 116.0706                                    | 3         |
| 155 | 0.67                    | Adenine       | C <sub>5</sub> H <sub>5</sub> N <sub>5</sub>                    | [M+H] <sup>+</sup> | 136.0618                 | 136.0616              | -1.5                      | 136.0617, 119.036,82.0270                   | 1.2       |
| 156 | 0.98                    | Niacin        | C <sub>6</sub> H <sub>5</sub> NO <sub>2</sub>                   | [M+H] <sup>+</sup> | 124.0393                 | 124.0394              | 0.4                       | 124.0393, 78.0376                           | 13        |
| 157 | 1.27                    | Pyrogallol    | C <sub>6</sub> H <sub>6</sub> O <sub>3</sub>                    | [M+H] <sup>+</sup> | 127.039                  | 127.0389              | -0.8                      | 109.0306, 99.459, 81.0371, 69.0011, 53.0441 | 4,5       |
| 158 | 1.33                    | Leucine       | C <sub>6</sub> H <sub>13</sub> NO <sub>2</sub>                  | [M+H] <sup>+</sup> | 132.1019                 | 132.1018              | -1                        | 86.0994, 69.0717                            | 7         |
| 159 | 1.34                    | Uracil        | C <sub>4</sub> H <sub>4</sub> N <sub>2</sub> O <sub>2</sub>     | [M+H] <sup>+</sup> | 113.0346                 | 113.0345              | -0.8                      | 96.0102, 70.0328                            | 1.2       |
| 160 | 1.35                    | Isoleucine    | C <sub>6</sub> H <sub>13</sub> NO <sub>2</sub>                  | [M+H] <sup>+</sup> | 132.1019                 | 132.1018              | -1                        | 132.1018, 86.099,79.0747                    | 1.2       |
| 8   | 2.01                    | Gallic acid   | C <sub>7</sub> H <sub>6</sub> O <sub>5</sub>                    | [M+H] <sup>+</sup> | 171.0288                 | 171.0286              | -1                        | 153.0187, 125.0242, 107.0144, 81.0364       | 9,10      |
| 161 | 2.07                    | cGMP          | C <sub>10</sub> H <sub>12</sub> N <sub>5</sub> O <sub>7</sub> P | [M+H] <sup>+</sup> | 346.0547                 | 346.0549              | 0.4                       | 152.0564, 135.0312                          | 3         |



|     |       |                                    |                                                                 |                     |          |          |      |                                                     |        |
|-----|-------|------------------------------------|-----------------------------------------------------------------|---------------------|----------|----------|------|-----------------------------------------------------|--------|
| 9   | 2.07  | Guanosine                          | C <sub>10</sub> H <sub>13</sub> N <sub>5</sub> O <sub>5</sub>   | [M+H] <sup>+</sup>  | 284.099  | 284.0994 | 1.4  | 152.0572, 135.0309, 110.0368                        | 1.2    |
| 10  | 2.35  | Adenosine cyclic<br>monophosphate  | C <sub>10</sub> H <sub>12</sub> N <sub>5</sub> O <sub>6</sub> P | [M+H] <sup>+</sup>  | 330.0598 | 330.0603 | 1.6  | 330.0614, 136.0626                                  | 3      |
| 11  | 2.57  | Phenylalanine                      | C <sub>9</sub> H <sub>11</sub> NO <sub>2</sub>                  | [M+H] <sup>+</sup>  | 166.0863 | 166.0861 | -0.7 | 120.0820, 103.0561, 77.0416                         | 1.2    |
| 13  | 4.31  | shanzhiside                        | C <sub>16</sub> H <sub>24</sub> O <sub>11</sub>                 | [M+H] <sup>+</sup>  | 393.1391 | 393.1398 | 1.7  | 309.1831, 195.0662, 149.0599                        | 8      |
| 161 | 5.33  | Eugenin                            | C <sub>11</sub> H <sub>10</sub> O <sub>4</sub>                  | [M+H] <sup>+</sup>  | 207.0652 | 207.0651 | -0.6 | 189.0551, 147.0448, 129.0345, 119.0503,<br>91.0573  | 13     |
| 162 | 5.33  | Scoparone                          | C <sub>11</sub> H <sub>10</sub> O <sub>4</sub>                  | [M+H] <sup>+</sup>  | 207.0652 | 207.0651 | -0.6 | 189.0551, 147.0448, 119.0503, 91.0573               | 14     |
| 163 | 6.21  | (S)-(-)-Stepholidine               | C <sub>19</sub> H <sub>21</sub> NO <sub>4</sub>                 | [M+H] <sup>+</sup>  | 328.1543 | 328.1546 | 0.9  | 283.0970, 251.0704, 223.0755, 205.0651,<br>177.0697 | 3      |
| 27  | 7.61  | oxypaeoniflorin                    | C <sub>23</sub> H <sub>28</sub> O <sub>12</sub>                 | [M+H] <sup>+</sup>  | 497.1654 | 497.1656 | 0.5  | 335.1097, 283.0827, 197.0811, 133.0654,<br>121.0302 | 9,10   |
| 26  | 7.36  | Chlorogenic acid                   | C <sub>16</sub> H <sub>18</sub> O <sub>9</sub>                  | [M+H] <sup>+</sup>  | 355.1024 | 355.1027 | 0.9  | 163.0399, 145.0291, 135.0449, 117.0347              | 9      |
| 164 | 8.15  | (S)-coclaurine                     | C <sub>17</sub> H <sub>19</sub> NO <sub>3</sub>                 | [M+H] <sup>+</sup>  | 286.1438 | 286.144  | 0.7  | 269.1188, 175.0758, 107.0508                        | 3      |
| 165 | 9.88  | Luteolin-7-glucoside               | C <sub>21</sub> H <sub>20</sub> O <sub>11</sub>                 | [M+Na] <sup>+</sup> | 471.0898 | 471.0895 | -0.7 | 471.0909, 351.0462                                  | 7      |
| 33  | 10.47 | Genipin                            | C <sub>11</sub> H <sub>14</sub> O <sub>5</sub>                  | [M+H] <sup>+</sup>  | 227.0914 | 227.0913 | -0.3 | 177.0549, 149.0600, 121.0663, 91.0567,<br>77.0422   | 8      |
| 35  | 10.88 | Indole-3-acetic acid               | C <sub>10</sub> H <sub>9</sub> NO <sub>2</sub>                  | [M+H] <sup>+</sup>  | 176.0706 | 176.0703 | -2   | 148.0752, 133.0531                                  | 3      |
| 36  | 10.97 | Paeonolide                         | C <sub>20</sub> H <sub>28</sub> O <sub>12</sub>                 | [M+Na] <sup>+</sup> | 483.1473 | 483.1473 | 0    | 483.1473, 317.0870                                  | 9,10   |
| 166 | 11.36 | (-)-Isborneol                      | C <sub>10</sub> H <sub>18</sub> O                               | [M+H] <sup>+</sup>  | 155.143  | 155.1428 | -1.4 | 155.14283                                           | 18     |
| 38  | 11.56 | Puerarin                           | C <sub>21</sub> H <sub>20</sub> O <sub>9</sub>                  | [M+H] <sup>+</sup>  | 417.118  | 417.1179 | -0.3 | 399.1076, 381.0991, 321.0766, 297.0769,<br>267.0667 | 14     |
| 43  | 12.26 | Apiopaeonoside                     | C <sub>20</sub> H <sub>28</sub> O <sub>12</sub>                 | [M+Na] <sup>+</sup> | 483.1473 | 483.1473 | -0.1 | 319.1172, 197.0814, 151.0757, 133.651               | 9,10   |
| 45  | 13.49 | paeoniflorin                       | C <sub>23</sub> H <sub>28</sub> O <sub>11</sub>                 | [M+H] <sup>+</sup>  | 481.1704 | 481.1704 | 0    | 483.1473, 317.0873                                  | 9,10   |
| 167 | 13.22 | 3-acetyl-4-<br>hydroxybenzoic acid | C <sub>9</sub> H <sub>8</sub> O <sub>4</sub>                    | [M+H] <sup>+</sup>  | 181.0495 | 181.0493 | -1.3 | 181.04931, 65.0450                                  | 9,10   |
| 168 | 13.22 | Caffeic acid                       | C <sub>9</sub> H <sub>8</sub> O <sub>4</sub>                    | [M+H] <sup>+</sup>  | 181.0495 | 181.0493 | -1.3 | 181.0492, 112.5035                                  | 8      |
| 169 | 13.83 | Asimilobine                        | C <sub>17</sub> H <sub>17</sub> NO <sub>2</sub>                 | [M+H] <sup>+</sup>  | 268.1332 | 268.1334 | 0.6  | 251.1089.0807, 191.0866, 165.0691                   | 3      |
| 170 | 14.1  | Scopoletin                         | C <sub>10</sub> H <sub>8</sub> O <sub>4</sub>                   | [M+H] <sup>+</sup>  | 193.0495 | 193.0495 | -0.3 | 178.0263, 150.0325, 133.0286, 122.0361,<br>184.0430 | 11, 12 |
| 171 | 18.72 | Saikochromoside A                  | C <sub>17</sub> H <sub>20</sub> O <sub>10</sub>                 | [M+H] <sup>+</sup>  | 385.1129 | 385.1132 | 0.7  | 223.0602, 206.0594, 177.0547                        | 13     |
| 53  | 18.62 | Isoquercitrin                      | C <sub>21</sub> H <sub>20</sub> O <sub>12</sub>                 | [M+H] <sup>+</sup>  | 465.1028 | 465.1029 | 0.2  | 303.0516, 135.1175                                  | 6      |
| 60  | 21.21 | Naringin                           | C <sub>27</sub> H <sub>32</sub> O <sub>14</sub>                 | [M+H] <sup>+</sup>  | 581.1865 | 581.1861 | -0.7 | 273.0758, 153.0189                                  | 15, 16 |
| 172 | 21.65 | Liriodenine                        | C <sub>17</sub> H <sub>9</sub> NO <sub>3</sub>                  | [M+H] <sup>+</sup>  | 276.0655 | 276.0657 | 0.5  | 220.0749, 190.0653                                  | 17     |
| 173 | 21.85 | Lactiflorin                        | C <sub>23</sub> H <sub>26</sub> O <sub>10</sub>                 | [M+H] <sup>+</sup>  | 463.1599 | 463.1579 | -4.2 | 463.1588                                            | 4,5    |

|     |        |                                                                                                                           |                                                 |                     |          |          |      |                                                           |        |
|-----|--------|---------------------------------------------------------------------------------------------------------------------------|-------------------------------------------------|---------------------|----------|----------|------|-----------------------------------------------------------|--------|
| 61  | 21.85  | Daidzein-4,7-diglucoside                                                                                                  | C <sub>27</sub> H <sub>30</sub> O <sub>14</sub> | [M+H] <sup>+</sup>  | 579.1708 | 579.171  | 0.3  | 579.1709, 271.0604                                        | 14     |
| 174 | 21.999 | paeoniflorigenone                                                                                                         | C <sub>17</sub> H <sub>18</sub> O <sub>6</sub>  | [M+H] <sup>+</sup>  | 319.1176 | 319.1179 | 0.9  | 151.0755, 105.034                                         | 4,5    |
| 63  | 22.11  | Hesperidin                                                                                                                | C <sub>28</sub> H <sub>34</sub> O <sub>15</sub> | [M+H] <sup>+</sup>  | 611.1971 | 611.1971 | 0.2  | 303.0867, 177.0551, 153.0192                              | 15, 16 |
| 65  | 22.35  | Spinosin                                                                                                                  | C <sub>28</sub> H <sub>32</sub> O <sub>15</sub> | [M+H] <sup>+</sup>  | 609.1814 | 609.1815 | 0.2  | 463.1254, 301.0713                                        | 13     |
| 175 | 22.54  | Gingerenone C                                                                                                             | C <sub>20</sub> H <sub>22</sub> O <sub>4</sub>  | [M+H] <sup>+</sup>  | 327.1591 | 327.1592 | 0.4  | 163.0760, 137.0605                                        | 18     |
| 176 | 22.76  | Neryl propanoate                                                                                                          | C <sub>13</sub> H <sub>22</sub> O <sub>2</sub>  | [M+H] <sup>+</sup>  | 211.1693 | 211.1692 | -0.4 | 211.1688, 175.1491                                        | 18     |
| 177 | 23.01  | Swertisin                                                                                                                 | C <sub>22</sub> H <sub>22</sub> O <sub>10</sub> | [M+H] <sup>+</sup>  | 447.1286 | 447.1283 | -0.7 | 285.0748                                                  | 3      |
| 69  | 23.01  | Neohesperidin                                                                                                             | C <sub>28</sub> H <sub>34</sub> O <sub>15</sub> | [M+H] <sup>+</sup>  | 611.1971 | 611.1971 | 0.2  | 303.0869, 195.0290, 153.0182                              | 15, 16 |
| 71  | 23.56  | 4',7-Dihydroxyflavone                                                                                                     | C <sub>15</sub> H <sub>10</sub> O <sub>4</sub>  | [M+H] <sup>+</sup>  | 255.0652 | 255.0653 | 0.3  | 237.0552, 227.0716, 199.0761, 181.0654, 137.0243, 91.0570 | 8      |
| 178 | 23.63  | Meranzin                                                                                                                  | C <sub>15</sub> H <sub>16</sub> O <sub>4</sub>  | [M+H] <sup>+</sup>  | 261.1121 | 261.1119 | -0.9 | 189.0537, 131.0492                                        | 15, 16 |
| 179 | 23.64  | Meranzin hydrate                                                                                                          | C <sub>15</sub> H <sub>18</sub> O <sub>5</sub>  | [M+H] <sup>+</sup>  | 279.1227 | 279.1227 | 0.1  | 243.1031, 189.0551, 131.0504                              | 15, 16 |
| 73  | 23.84  | Ononin                                                                                                                    | C <sub>22</sub> H <sub>22</sub> O <sub>9</sub>  | [M+H] <sup>+</sup>  | 431.1337 | 431.1338 | 0.3  | 431.1337, 269.0811                                        | 14     |
| 74  | 23.96  | Daidzein                                                                                                                  | C <sub>15</sub> H <sub>10</sub> O <sub>4</sub>  | [M+H] <sup>+</sup>  | 255.0652 | 255.0653 | 0.3  | 237.0552, 227.0716, 199.0761, 181.0654, 137.0243          | 14     |
| 180 | 26.28  | Hexopyranosyl-(1->3)-<br>[hexopyranosyl-(1->6)]-1-<br>O-(3,23-dihydroxy-23,28-<br>dioxoolean-12-en-28-<br>yl)hexopyranose | C <sub>48</sub> H <sub>76</sub> O <sub>20</sub> | [M+H] <sup>+</sup>  | 973.5003 | 973.5023 | 2.1  | 973.3679, 485.3319                                        | 8      |
| 181 | 26.95  | yatein                                                                                                                    | C <sub>22</sub> H <sub>24</sub> O <sub>7</sub>  | [M+H] <sup>+</sup>  | 401.1595 | 401.1599 | 1    | 383.1059, 315.0872, 217.0866, 167.0699                    | 13     |
| 182 | 27.04  | (Z)-3-butylidenephthalide                                                                                                 | C <sub>12</sub> H <sub>12</sub> O <sub>2</sub>  | [M+H] <sup>+</sup>  | 189.091  | 189.0909 | -0.7 | 189.0908, 128.0632                                        | 1.2    |
| 58  | 28.55  | Mudanpioside H                                                                                                            | C <sub>30</sub> H <sub>32</sub> O <sub>14</sub> | [M+H] <sup>+</sup>  | 617.1865 | 617.1849 | -2.6 | 617.18486, 331.1012                                       | 9,10   |
| 183 | 28.83  | Gingerenone B                                                                                                             | C <sub>22</sub> H <sub>26</sub> O <sub>6</sub>  | [M+H] <sup>+</sup>  | 387.1802 | 387.1806 | 0.9  | 207.1012, 175.0762, 167.0707, 137.0604                    | 18     |
| 84  | 29.01  | Genistein                                                                                                                 | C <sub>15</sub> H <sub>10</sub> O <sub>5</sub>  | [M+H] <sup>+</sup>  | 271.0601 | 271.0604 | 0.9  | 215.0701, 197.0602, 153.0198                              | 14     |
| 85  | 29.21  | 7,8,4'-<br>trihydroxyisoflavone                                                                                           | C <sub>15</sub> H <sub>10</sub> O <sub>5</sub>  | [M+H] <sup>+</sup>  | 271.0601 | 271.0604 | 0.9  | 243.0646, 215.0687, 153.0187                              | 14     |
| 184 | 29.29  | Gingerenone A                                                                                                             | C <sub>21</sub> H <sub>24</sub> O <sub>5</sub>  | [M+H] <sup>+</sup>  | 357.1697 | 357.17   | 1    | 177.0914, 145.0656, 137.0605, 131.0502, 117.0713          | 18     |
| 185 | 30.7   | Hederagenin                                                                                                               | C <sub>30</sub> H <sub>48</sub> O <sub>4</sub>  | [M+H] <sup>+</sup>  | 473.3625 | 473.3625 | 0    | 473.3636, 437.3511                                        | 4,5    |
| 91  | 31     | benzoylpaeoniflorin                                                                                                       | C <sub>30</sub> H <sub>32</sub> O <sub>12</sub> | [M+H] <sup>+</sup>  | 585.1967 | 585.1972 | 0.9  | 319.1181, 267.0902, 249.0755, 197.0820                    | 4,5    |
| 186 | 32.01  | Neral                                                                                                                     | C <sub>10</sub> H <sub>16</sub> O               | [M+H] <sup>+</sup>  | 153.1274 | 153.1279 | 0.4  | 153.1279                                                  | 18     |
| 187 | 32.69  | Menthoside                                                                                                                | C <sub>36</sub> H <sub>36</sub> O <sub>17</sub> | [M+Na] <sup>+</sup> | 763.1845 | 763.1851 | 0.8  | 783.1893, 619.1345, 517.0956                              | 7      |

|     |       |                      |                                                 |                    |          |          |      |                                               |        |
|-----|-------|----------------------|-------------------------------------------------|--------------------|----------|----------|------|-----------------------------------------------|--------|
| 188 | 32.99 | Phellandral          | C <sub>10</sub> H <sub>16</sub> O               | [M+H] <sup>+</sup> | 153.1274 | 153.1275 | 0.2  | 153.1275                                      | 17     |
| 189 | 33.87 | Pulegone             | C <sub>10</sub> H <sub>16</sub> O               | [M+H] <sup>+</sup> | 153.1274 | 153.1273 | -0.8 | 107.0859, 91.0546, 81.0722, 79.0567           | 17     |
| 190 | 33.87 | Liconeolignan        | C <sub>21</sub> H <sub>22</sub> O <sub>5</sub>  | [M+H] <sup>+</sup> | 355.154  | 355.1525 | -4.4 | 355.1539, 185.0210                            | 11, 12 |
| 191 | 33.87 | Citral               | C <sub>10</sub> H <sub>16</sub> O               | [M+H] <sup>+</sup> | 153.1274 | 153.1273 | -0.8 | 107.0859, 91.0546, 81.0722, 79.0567           | 18     |
| 98  | 35.28 | Gardenone            | C <sub>12</sub> H <sub>20</sub> O <sub>3</sub>  | [M+H] <sup>+</sup> | 213.1485 | 213.1485 | 0    | 213.1485, 79.0575                             | 8      |
| 192 | 36.51 | Guaiene              | C <sub>15</sub> H <sub>24</sub>                 | [M+H] <sup>+</sup> | 205.1951 | 205.1949 | -0.7 | 149.0260, 135.1162, 107.0873, 81.0745         | 18     |
| 193 | 36.69 | (+)-β-selinene       | C <sub>15</sub> H <sub>24</sub>                 | [M+H] <sup>+</sup> | 205.1951 | 205.1949 | -0.7 | 205.1851, 149.0231                            | 6      |
| 194 | 36.69 | β-chamigrene         | C <sub>15</sub> H <sub>24</sub>                 | [M+H] <sup>+</sup> | 205.1951 | 205.1949 | -0.7 | 149.1329, 135.1179, 123.1184, 81.0722         | 1, 2   |
| 195 | 36.69 | copaene              | C <sub>15</sub> H <sub>24</sub>                 | [M+H] <sup>+</sup> | 205.1951 | 205.1949 | -0.7 | 149.1329, 135.1179, 123.1184, 93.0718, 81.072 | 18     |
| 196 | 36.69 | β-selinene           | C <sub>15</sub> H <sub>24</sub>                 | [M+H] <sup>+</sup> | 205.1951 | 205.1949 | -0.7 | 149.0260, 135.1162, 81.0745                   | 8      |
| 197 | 36.69 | germacrene B         | C <sub>15</sub> H <sub>24</sub>                 | [M+H] <sup>+</sup> | 205.1951 | 205.1949 | -0.7 | 149.1329, 135.1179, 123.1184, 81.0722         | 15, 16 |
| 198 | 36.92 | β-curcumene          | C <sub>15</sub> H <sub>24</sub>                 | [M+H] <sup>+</sup> | 205.1951 | 205.1949 | -0.7 | 149.0260, 135.1162, 107.0873, 81.0745         | 11, 12 |
| 199 | 37.21 | Saikosaponin I       | C <sub>48</sub> H <sub>78</sub> O <sub>17</sub> | [M+H] <sup>+</sup> | 927.5312 | 927.5325 | 1.4  | 745.4441, 421.3483                            | 13     |
| 200 | 38.07 | Saikosaponin f       | C <sub>48</sub> H <sub>80</sub> O <sub>17</sub> | [M+H] <sup>+</sup> | 929.5468 | 929.5486 | 1.9  | 603.42841.3748, 423.3652, 309.1211            | 13     |
| 201 | 38.33 | Safrole              | C <sub>10</sub> H <sub>10</sub> O <sub>2</sub>  | [M+H] <sup>+</sup> | 163.0754 | 163.0754 | 0    | 131.0505, 103.0560, 77.0420                   | 1, 2   |
| 202 | 38.76 | 6-gingediol          | C <sub>17</sub> H <sub>28</sub> O <sub>4</sub>  | [M+H] <sup>+</sup> | 297.206  | 297.2062 | 0.6  | 281.0507, 248.9910, 163.0773, 137.0611        | 18     |
| 203 | 38.95 | β-sesquiphellandrene | C <sub>15</sub> H <sub>24</sub>                 | [M+H] <sup>+</sup> | 205.1951 | 205.1953 | 0.3  | 205.1953                                      | 18     |
| 100 | 39.64 | 3'-Methoxydaidzein   | C <sub>16</sub> H <sub>12</sub> O <sub>5</sub>  | [M+H] <sup>+</sup> | 285.0758 | 285.076  | 0.9  | 270.0554, 242.0579, 153.0198                  | 14     |
| 102 | 39.86 | 6-Gingerol           | C <sub>17</sub> H <sub>26</sub> O <sub>4</sub>  | [M+H] <sup>+</sup> | 295.1904 | 295.1905 | 0.3  | 277.2156, 163.0763, 137.0605                  | 18     |
| 204 | 39.86 | 6-shogaol            | C <sub>17</sub> H <sub>24</sub> O <sub>3</sub>  | [M+H] <sup>+</sup> | 277.1798 | 277.18   | 0.5  | 177.0980, 145.0652, 137.0605, 117.0709        | 18     |
| 205 | 39.93 | Nobiletin            | C <sub>21</sub> H <sub>22</sub> O <sub>8</sub>  | [M+H] <sup>+</sup> | 403.1387 | 403.1391 | 0.9  | 388.1173, 373.0929                            | 15, 16 |
| 206 | 40.58 | Zizyberanalic acid   | C <sub>30</sub> H <sub>46</sub> O <sub>4</sub>  | [M+H] <sup>+</sup> | 471.3469 | 471.3471 | 0.4  | 471.34689                                     | 3      |
| 105 | 40.58 | Glycyrrhizic acid    | C <sub>42</sub> H <sub>62</sub> O <sub>16</sub> | [M+H] <sup>+</sup> | 823.4111 | 823.4115 | 0.6  | 647.3800, 417.3479, 453.3360, 435.3269        | 11, 12 |
| 207 | 41.06 | Atractylenolide III  | C <sub>15</sub> H <sub>20</sub> O <sub>3</sub>  | [M+H] <sup>+</sup> | 249.1485 | 249.1487 | 0.5  | 231.1389, 163.0756, 105.0708                  | 6      |
| 107 | 41.79 | Saikosaponin A       | C <sub>42</sub> H <sub>68</sub> O <sub>13</sub> | [M+H] <sup>+</sup> | 781.4733 | 781.474  | 0.9  | 455.3455, 437.3488, 419.3331, 407.3332        | 13     |
| 208 | 41.79 | Prosaikogenin G      | C <sub>36</sub> H <sub>58</sub> O <sub>8</sub>  | [M+H] <sup>+</sup> | 619.4205 | 619.4208 | 0.5  | 455.3531, 437.3465, 407.3330, 253.1950        | 13     |
| 209 | 42.09 | Prosaikogenin F      | C <sub>36</sub> H <sub>58</sub> O <sub>8</sub>  | [M+H] <sup>+</sup> | 619.4205 | 619.4208 | 0.5  | 455.3531, 437.3465, 407.3330, 253.1950        | 13     |
| 108 | 42.1  | Saikosaponin D       | C <sub>42</sub> H <sub>68</sub> O <sub>13</sub> | [M+H] <sup>+</sup> | 781.4733 | 781.474  | 0.9  | 619.2516, 473.2350, 441.1020                  | 13     |
| 111 | 42.37 | Bupleuroside I       | C <sub>48</sub> H <sub>78</sub> O <sub>18</sub> | [M+H] <sup>+</sup> | 943.5261 | 943.5274 | 1.4  | 797.4711, 599.3992, 441.3761, 423.3645        | 13     |
| 112 | 42.37 | Jujubasaponin V      | C <sub>48</sub> H <sub>78</sub> O <sub>18</sub> | [M+H] <sup>+</sup> | 943.5261 | 943.5274 | 1.4  | 797.4711, 599.3992, 441. 3781, 423.3645       | 17     |
| 210 | 42.48 | Chaihunaphthone      | C <sub>22</sub> H <sub>18</sub> O <sub>7</sub>  | [M+H] <sup>+</sup> | 395.1125 | 395.1109 | -4.2 | 395.11086                                     | 13     |
| 113 | 42.53 | Isokaerophyllin      | C <sub>21</sub> H <sub>20</sub> O <sub>6</sub>  | [M+H] <sup>+</sup> | 369.1333 | 369.1333 | 0    | 313.0724, 285.0780, 255.0659                  | 13     |
| 114 | 42.53 | Curcumin             | C <sub>21</sub> H <sub>20</sub> O <sub>6</sub>  | [M+H] <sup>+</sup> | 369.1333 | 369.1333 | 0    | 313.0724, 285.0780, 255.0659                  | 18     |

|     |       |                       |                                                 |                    |          |          |      |                                        |        |
|-----|-------|-----------------------|-------------------------------------------------|--------------------|----------|----------|------|----------------------------------------|--------|
| 211 | 42.79 | Prosaikogenin A       | C <sub>36</sub> H <sub>58</sub> O <sub>8</sub>  | [M+H] <sup>+</sup> | 619.4205 | 619.4208 | 0.5  | 455.3531, 437.3465, 407.3330, 253.1950 | 13     |
| 116 | 42.99 | Saikosaponin B1       | C <sub>42</sub> H <sub>68</sub> O <sub>13</sub> | [M+H] <sup>+</sup> | 781.4733 | 781.474  | 0.9  | 455.3455, 437.3488, 419.3331, 407.3332 | 13     |
| 118 | 43.34 | Saikosaponin B2       | C <sub>42</sub> H <sub>68</sub> O <sub>13</sub> | [M+H] <sup>+</sup> | 781.4733 | 781.474  | 0.9  | 455.3521, 437.3434, 419.3334           | 13     |
| 212 | 43.59 | Lupenone              | C <sub>30</sub> H <sub>48</sub> O               | [M+H] <sup>+</sup> | 425.3778 | 425.3778 | -0.1 | 257.1839,                              | 20     |
| 213 | 44.16 | Ligustilide           | C <sub>12</sub> H <sub>14</sub> O <sub>2</sub>  | [M+H] <sup>+</sup> | 191.1067 | 191.1065 | -0.8 | 173.0985, 145.1006, 115.0562, 91.0554  | 1,2    |
| 127 | 45.17 | Glycyrol              | C <sub>21</sub> H <sub>18</sub> O <sub>6</sub>  | [M+H] <sup>+</sup> | 367.1176 | 367.1179 | 0.9  | 367.1201, 311.0534, 2810480            | 11, 12 |
| 214 | 45.98 | Atractylenolide II    | C <sub>15</sub> H <sub>20</sub> O <sub>2</sub>  | [M+H] <sup>+</sup> | 233.1536 | 233.1537 | 0.2  | 215.1418, 187.1478, 131.0856           | 6      |
| 128 | 46.07 | Honokiol              | C <sub>18</sub> H <sub>18</sub> O <sub>2</sub>  | [M+H] <sup>+</sup> | 267.138  | 267.1377 | -0.8 | 239.1078, 211.0764, 197.0600, 165.0706 | 17     |
| 215 | 46.61 | Bupleuroside V        | C <sub>42</sub> H <sub>66</sub> O <sub>15</sub> | [M+H] <sup>+</sup> | 811.4475 | 811.4482 | 0.9  | 599.3950, 441.3772, 423.3634,          | 13     |
| 216 | 46.61 | (8)-Gingerol          | C <sub>19</sub> H <sub>30</sub> O <sub>4</sub>  | [M+H] <sup>+</sup> | 323.2217 | 323.2213 | -1.1 | 177.0914, 137.0604                     | 18     |
| 130 | 47.6  | Magnolol              | C <sub>18</sub> H <sub>18</sub> O <sub>2</sub>  | [M+H] <sup>+</sup> | 267.138  | 267.1377 | -0.8 | 239.1078, 211.0769, 197.0608, 165.0708 | 17     |
| 132 | 48.11 | Iso-Glycyrol          | C <sub>21</sub> H <sub>18</sub> O <sub>6</sub>  | [M+H] <sup>+</sup> | 367.1176 | 367.1179 | 0.9  | 367.1179                               | 11, 12 |
| 217 | 48.25 | Atractylenolide I     | C <sub>15</sub> H <sub>18</sub> O <sub>2</sub>  | [M+H] <sup>+</sup> | 231.138  | 231.1381 | 0.8  | 163.0758, 105.0715, 77.0422            | 6      |
| 218 | 48.45 | Xanthorrhizol         | C <sub>15</sub> H <sub>22</sub> O               | [M+H] <sup>+</sup> | 219.1743 | 219.1742 | -0.7 | 203.1365, 145.1013, 91.0549            | 18     |
| 139 | 48.89 | Tumulolic acid        | C <sub>31</sub> H <sub>50</sub> O <sub>4</sub>  | [M+H] <sup>+</sup> | 487.3782 | 487.3774 | -1.7 | 469.3681                               | 19, 20 |
| 219 | 50.24 | (-)- $\alpha$ -Pinene | C <sub>10</sub> H <sub>16</sub>                 | [M+H] <sup>+</sup> | 137.1325 | 137.1322 | -2.3 | 137.0646, 122.0394                     | 18     |
| 220 | 50.24 | Camphene              | C <sub>10</sub> H <sub>16</sub>                 | [M+H] <sup>+</sup> | 137.1325 | 137.1322 | -2.3 | 137.0646, 122.0394                     | 18     |
| 221 | 50.24 | (-)-Nopinene          | C <sub>10</sub> H <sub>16</sub>                 | [M+H] <sup>+</sup> | 137.1325 | 137.1322 | -2.3 | 137.1324                               | 15, 16 |
| 222 | 50.52 | Linalool Oxide        | C <sub>10</sub> H <sub>18</sub> O <sub>2</sub>  | [M+H] <sup>+</sup> | 171.138  | 171.1377 | -1.5 | 141.0631, 73.0324                      | 18     |
| 223 | 51.48 | 1-Monolinolein        | C <sub>21</sub> H <sub>38</sub> O <sub>4</sub>  | [M+H] <sup>+</sup> | 355.2843 | 355.2825 | -5   | 355.2828                               | 18     |
| 224 | 51.78 | 10-Gingerdione        | C <sub>21</sub> H <sub>32</sub> O <sub>4</sub>  | [M+H] <sup>+</sup> | 349.2373 | 349.2375 | 0.5  | 331.2280, 155.1442, 137.0607           | 18     |
| 149 | 52.14 | Linoleic acid         | C <sub>18</sub> H <sub>32</sub> O <sub>2</sub>  | [M+H] <sup>+</sup> | 281.2475 | 281.2473 | -0.7 | 242.2316, 95.0898                      | 13     |
| 225 | 52.51 | Trochol               | C <sub>30</sub> H <sub>50</sub> O <sub>2</sub>  | [M+H] <sup>+</sup> | 443.3884 | 443.3885 | 0.3  | 217.1937, 191.1752, 163.148            | 3      |

Table 4 Precision and accuracy for twelve compounds in rats plasma (n=6)

| Analytes            | Spiked concentration (ng/mL) | Intra-day                      |                  |                | Inter-day                      |                  |                |
|---------------------|------------------------------|--------------------------------|------------------|----------------|--------------------------------|------------------|----------------|
|                     |                              | Measured concentration (ng/mL) | Precision RSD(%) | Accuracy RE(%) | Measured concentration (ng/mL) | Precision RSD(%) | Accuracy RE(%) |
| Atractylenolide III | 2.0(LLOQ)                    | 1.93±0.08                      | 4.09             | -3.42          | 2.04±0.12                      | 5.75             | 1.92           |
|                     | 4.0(Low)                     | 4.14±0.07                      | 1.77             | 3.54           | 4.16±0.14                      | 3.41             | 3.88           |
|                     | 200.0(Medium)                | 214.50±13.58                   | 6.33             | 7.25           | 214.50±11.40                   | 5.31             | 7.25           |
|                     | 2000.0(High)                 | 2240.00±116.48                 | 5.20             | 12.00          | 2110.00±174.12                 | 8.25             | 5.50           |
| Daidzein            | 2.0(LLOQ)                    | 1.88±0.15                      | 8.19             | -6.25          | 2.06±0.09                      | 4.23             | 2.92           |
|                     | 4.0(Low)                     | 4.12±0.18                      | 4.35             | 2.88           | 4.31±0.21                      | 4.94             | 7.67           |
|                     | 200.0(Medium)                | 202.33±4.23                    | 2.09             | 1.17           | 208.83±11.92                   | 5.71             | 4.42           |
|                     | 2000.0(High)                 | 1973.33±62.18                  | 3.25             | -1.33          | 2138.33±55.29                  | 2.59             | 6.92           |
| Ferulic Acid        | 2.0(LLOQ)                    | 2.32±0.04                      | 1.98             | 6.75           | 2.04±0.17                      | 8.40             | 2.17           |
|                     | 4.0(Low)                     | 4.66±0.21                      | 4.49             | 16.46          | 4.53±0.06                      | 1.33             | 13.21          |
|                     | 200.0(Medium)                | 194.67±9.05                    | 4.65             | -2.67          | 212.67±21.71                   | 10.21            | 6.33           |
|                     | 2000.0(High)                 | 1731.67±46.23                  | 2.67             | -13.45         | 1883.33±82.87                  | 4.40             | -5.83          |
| Geniposide          | 2.0(LLOQ)                    | 2.00±0.18                      | 8.87             | 0.17           | 2.02±0.13                      | 6.26             | 1.17           |
|                     | 4.0(Low)                     | 3.93±0.18                      | 4.64             | -1.67          | 4.20±0.27                      | 6.37             | 5.00           |
|                     | 200.0(Medium)                | 198.67±12.42                   | 6.25             | -0.67          | 213.67±15.96                   | 7.47             | 6.83           |
|                     | 2000.0(High)                 | 1866.67±53.91                  | 2.89             | -6.67          | 2033.33±142.22                 | 6.99             | 1.67           |
| Glycyrrhizic acid   | 2.0(LLOQ)                    | 1.97±0.15                      | 7.72             | -1.75          | 2.07±0.16                      | 7.73             | 3.25           |
|                     | 4.0(Low)                     | 4.09±0.18                      | 4.52             | 2.25           | 4.06±0.18                      | 4.48             | 1.46           |
|                     | 200.0(Medium)                | 199.00±9.25                    | 4.65             | -0.50          | 201.00±18.89                   | 9.40             | 0.50           |
|                     | 2000.0(High)                 | 1785±60.25                     | 3.38             | -10.75         | 1918.33±89.54                  | 4.68             | -4.08          |
| Hesperidin          | 2.0(LLOQ)                    | 2.03±0.14                      | 7.04             | 1.27           | 2.05±0.15                      | 7.48             | 2.42           |
|                     | 4.0(Low)                     | 4.33±0.14                      | 3.34             | 8.25           | 4.19±0.29                      | 6.89             | 4.83           |
|                     | 200.0(Medium)                | 200.67±5.43                    | 2.71             | 0.33           | 213.17±20.99                   | 9.85             | 6.58           |

|                  |               |                |      |        |                |       |       |
|------------------|---------------|----------------|------|--------|----------------|-------|-------|
| Liquiritin       | 2000.0(High)  | 1754.83±44.23  | 2.52 | -12.26 | 1885.00±120.29 | 6.38  | -5.75 |
|                  | 2.0(LLOQ)     | 1.84±0.10      | 5.52 | -8.08  | 2.11±0.08      | 3.98  | 5.33  |
|                  | 4.0(Low)      | 4.19±0.21      | 5.07 | 4.75   | 4.28±0.23      | 5.34  | 6.88  |
|                  | 200.0(Medium) | 196.67±11.66   | 5.93 | -1.67  | 206.50±26.07   | 12.62 | 3.25  |
| Magnolol         | 2000.0(High)  | 2041.67±110.35 | 5.40 | 2.08   | 2006.67±158.83 | 7.92  | 0.33  |
|                  | 2.0(LLOQ)     | 1.92±0.13      | 6.85 | -4.08  | 2.14±0.27      | 12.45 | 6.92  |
|                  | 4.0(Low)      | 4.29±0.07      | 1.61 | 7.33   | 4.18±0.34      | 8.13  | 4.54  |
|                  | 200.0(Medium) | 198.00±4.94    | 2.49 | -1.00  | 214.50±13.23   | 6.17  | 7.25  |
| Meranzin hydrate | 2000.0(High)  | 2138.33±83.53  | 3.91 | 6.92   | 1975.00±81.91  | 4.15  | -1.25 |
|                  | 2.0(LLOQ)     | 2.12±0.09      | 4.24 | 6.17   | 2.17±0.09      | 4.07  | 8.33  |
|                  | 4.0(Low)      | 3.88±0.14      | 3.60 | -2.92  | 3.96±0.12      | 2.96  | -0.92 |
|                  | 200.0(Medium) | 200.50±7.01    | 3.49 | 0.25   | 190.83±17.37   | 9.10  | -4.58 |
| Naringin         | 2000.0(High)  | 1763.33±56.10  | 3.18 | -11.83 | 1830.00±50.20  | 2.74  | -8.50 |
|                  | 2.0(LLOQ)     | 2.10±0.19      | 9.06 | 5.08   | 2.13±0.15      | 6.97  | 6.33  |
|                  | 4.0(Low)      | 4.06±0.11      | 2.65 | 1.42   | 4.04±0.25      | 6.24  | 1.00  |
|                  | 200.0(Medium) | 200.50±4.37    | 2.18 | 0.25   | 219.00±17.06   | 7.79  | 9.50  |
| Paeoniflorin     | 2000.0(High)  | 2008.33±125.76 | 6.26 | 0.42   | 2102.50±126.48 | 6.02  | 5.13  |
|                  | 2.0(LLOQ)     | 2.00±0.11      | 5.70 | -0.25  | 1.97±0.28      | 14.37 | -1.58 |
|                  | 4.0(Low)      | 4.05±0.30      | 7.32 | 1.17   | 4.02±0.15      | 3.64  | 0.46  |
|                  | 200.0(Medium) | 203.67±9.91    | 4.87 | 1.83   | 222.50±8.55    | 3.84  | 11.25 |
| Puerarin         | 2000.0(High)  | 2240.00±38.99  | 1.74 | 12.00  | 2197.00±71.26  | 3.24  | 9.85  |
|                  | 2.0(LLOQ)     | 1.99±0.19      | 9.56 | -0.33  | 2.22±0.12      | 5.44  | 11.08 |
|                  | 4.0(Low)      | 4.05±0.23      | 5.80 | 1.67   | 3.99±0.24      | 5.94  | -0.25 |
|                  | 200.0(Medium) | 219.50±12.05   | 5.49 | 9.75   | 231.50±8.92    | 3.85  | 15.75 |
|                  | 2000.0(High)  | 1936.67±66.23  | 3.42 | -3.17  | 1940±164.32    | 8.47  | -3.00 |

Table5 Extraction recovery and matrix effects for twelve compounds in rats plasma (n=6)

| Analytes            | Spiked concentration<br>(ng/mL) | Extraction Recovery |        | Matrix effect |        |
|---------------------|---------------------------------|---------------------|--------|---------------|--------|
|                     |                                 | Mean(%)             | RSD(%) | Mean(%)       | RSD(%) |
| Atractylenolide III | 2.0(LLOQ)                       | 90.97               | 4.12   | 91.91         | 4.53   |
|                     | 4.0(Low)                        | 92.81               | 5.52   | 93.40         | 6.13   |
|                     | 200.0(Medium)                   | 94.55               | 5.09   | 90.11         | 5.76   |
|                     | 2000.0(High)                    | 95.17               | 3.68   | 97.88         | 1.60   |
| Daidzein            | 2.0(LLOQ)                       | 91.91               | 4.76   | 96.14         | 2.59   |
|                     | 4.0(Low)                        | 97.56               | 3.28   | 93.68         | 3.49   |
|                     | 200.0(Medium)                   | 97.20               | 2.08   | 95.11         | 3.90   |
|                     | 2000.0(High)                    | 95.33               | 3.15   | 96.91         | 3.09   |
| Ferulic Acid        | 2.0(LLOQ)                       | 92.87               | 3.70   | 90.90         | 6.75   |
|                     | 4.0(Low)                        | 93.03               | 5.71   | 94.63         | 5.70   |
|                     | 200.0(Medium)                   | 94.92               | 4.67   | 96.98         | 4.85   |
|                     | 2000.0(High)                    | 96.73               | 3.23   | 94.70         | 2.85   |
| Geniposide          | 2.0(LLOQ)                       | 91.48               | 5.67   | 96.86         | 3.11   |
|                     | 4.0(Low)                        | 93.83               | 3.61   | 96.18         | 5.61   |
|                     | 200.0(Medium)                   | 95.04               | 6.22   | 92.99         | 5.82   |
|                     | 2000.0(High)                    | 97.73               | 2.89   | 93.97         | 3.35   |
| Glycyrrhizic acid   | 2.0(LLOQ)                       | 93.42               | 3.47   | 92.28         | 4.01   |
|                     | 4.0(Low)                        | 96.25               | 2.84   | 95.75         | 3.10   |
|                     | 200.0(Medium)                   | 94.78               | 4.59   | 91.47         | 5.61   |
|                     | 2000.0(High)                    | 95.46               | 3.37   | 96.48         | 2.68   |
| Hesperidin          | 2.0(LLOQ)                       | 95.56               | 3.31   | 95.67         | 2.01   |
|                     | 4.0(Low)                        | 96.79               | 2.19   | 97.47         | 3.35   |
|                     | 200.0(Medium)                   | 96.03               | 2.67   | 92.25         | 5.63   |
|                     | 2000.0(High)                    | 97.49               | 2.52   | 90.90         | 5.55   |
| Liquiritin          | 2.0(LLOQ)                       | 96.72               | 2.88   | 96.42         | 2.18   |
|                     | 4.0(Low)                        | 94.63               | 3.62   | 96.13         | 2.35   |
|                     | 200.0(Medium)                   | 95.50               | 5.88   | 95.80         | 4.62   |
|                     | 2000.0(High)                    | 92.81               | 5.40   | 95.59         | 3.92   |

|                  |               |       |      |       |      |
|------------------|---------------|-------|------|-------|------|
|                  | 2.0(LLOQ)     | 95.41 | 4.27 | 95.20 | 3.33 |
| Magnolol         | 4.0(Low)      | 97.95 | 1.27 | 96.51 | 3.40 |
|                  | 200.0(Medium) | 96.13 | 2.48 | 93.04 | 5.62 |
|                  | 2000.0(High)  | 97.20 | 3.90 | 96.76 | 3.06 |
|                  | 2.0(LLOQ)     | 96.28 | 2.76 | 90.77 | 4.41 |
| Meranzin hydrate | 4.0(Low)      | 95.04 | 2.79 | 91.11 | 5.49 |
|                  | 200.0(Medium) | 95.02 | 3.48 | 96.02 | 2.62 |
|                  | 2000.0(High)  | 96.89 | 3.18 | 95.89 | 3.97 |
|                  | 2.0(LLOQ)     | 95.26 | 5.20 | 93.96 | 5.30 |
| Naringin         | 4.0(Low)      | 96.78 | 1.92 | 95.33 | 4.16 |
|                  | 200.0(Medium) | 97.35 | 2.16 | 94.78 | 4.69 |
|                  | 2000.0(High)  | 91.29 | 6.26 | 96.12 | 4.81 |
|                  | 2.0(LLOQ)     | 96.26 | 3.42 | 96.47 | 1.99 |
| Paeoniflorin     | 4.0(Low)      | 94.77 | 5.52 | 94.60 | 4.55 |
|                  | 200.0(Medium) | 93.88 | 4.84 | 94.93 | 4.25 |
|                  | 2000.0(High)  | 97.82 | 1.74 | 95.09 | 4.04 |
|                  | 2.0(LLOQ)     | 91.19 | 6.17 | 94.02 | 2.93 |
| Puerarin         | 4.0(Low)      | 93.02 | 4.56 | 94.81 | 3.88 |
|                  | 200.0(Medium) | 95.86 | 5.46 | 94.81 | 4.09 |
|                  | 2000.0(High)  | 94.93 | 3.42 | 93.47 | 3.78 |

---



Table 6 Stability of twelve compounds in rats plasma (n=6)

| Analytes            | Spiked concentration<br>(ng/mL) | Freeze-thraw |        | Long-term |        | Short-term |        | Processed -stability |        |
|---------------------|---------------------------------|--------------|--------|-----------|--------|------------|--------|----------------------|--------|
|                     |                                 | RE(%)        | RSD(%) | RE(%)     | RSD(%) | RE(%)      | RSD(%) | RE(%)                | RSD(%) |
| Atractylenolide III | 2.0(LLOQ)                       | 1.17         | 7.34   | 4.00      | 2.74   | 3.67       | 6.23   | 6.00                 | 4.94   |
|                     | 4.0(Low)                        | 5.67         | 2.90   | 9.46      | 3.50   | 6.63       | 3.40   | 1.33                 | 4.28   |
|                     | 200.0(Medium)                   | 12.33        | 5.29   | 3.92      | 2.42   | -2.67      | 10.53  | 10.83                | 4.00   |
|                     | 2000.0(High)                    | 7.75         | 4.94   | 5.17      | 5.32   | 4.17       | 5.95   | 3.92                 | 8.21   |
| Daidzein            | 2.0(LLOQ)                       | 5.42         | 6.60   | 5.58      | 4.44   | 3.67       | 5.99   | 1.42                 | 6.42   |
|                     | 4.0(Low)                        | 8.71         | 3.77   | 3.50      | 4.85   | 6.71       | 4.87   | 0.67                 | 3.33   |
|                     | 200.0(Medium)                   | 3.50         | 5.34   | 6.75      | 2.60   | 9.08       | 2.74   | 8.67                 | 1.38   |
| Ferulic Acid        | 2000.0(High)                    | 7.33         | 3.78   | 7.42      | 2.47   | 9.75       | 3.99   | 10.83                | 2.01   |
|                     | 2.0(LLOQ)                       | 6.17         | 7.29   | -1.42     | 7.67   | -0.25      | 5.53   | -7.50                | 5.70   |
|                     | 4.0(Low)                        | 8.75         | 7.52   | 10.71     | 2.82   | 10.42      | 6.59   | 3.88                 | 7.16   |
|                     | 200.0(Medium)                   | 6.58         | 8.96   | 11.17     | 3.15   | -0.83      | 11.75  | 3.67                 | 4.93   |
| Geniposide          | 2000.0(High)                    | -7.75        | 2.54   | -4.67     | 4.31   | -9.17      | 6.22   | -5.83                | 5.99   |
|                     | 2.0(LLOQ)                       | 3.58         | 5.29   | 4.00      | 7.28   | 2.42       | 9.71   | -1.17                | 5.63   |
|                     | 4.0(Low)                        | 2.29         | 6.12   | 2.38      | 5.13   | 10.21      | 8.21   | 10.88                | 2.07   |
|                     | 200.0(Medium)                   | 5.58         | 6.12   | 5.33      | 7.30   | 4.50       | 8.32   | 12.08                | 5.65   |
| Glycyrrhizic acid   | 2000.0(High)                    | 4.50         | 3.83   | -1.25     | 6.48   | -6.25      | 5.83   | 2.75                 | 6.63   |
|                     | 2.0(LLOQ)                       | -1.75        | 7.57   | -4.50     | 6.02   | 3.81       | 11.09  | 6.75                 | 5.77   |
|                     | 4.0(Low)                        | 5.83         | 4.57   | -0.67     | 3.93   | 0.96       | 8.20   | -1.42                | 4.23   |
|                     | 200.0(Medium)                   | -3.00        | 7.58   | -4.75     | 6.75   | 5.25       | 6.50   | -2.58                | 9.17   |
| Hesperidin          | 2000.0(High)                    | -4.75        | 3.99   | -2.33     | 8.84   | -2.75      | 9.55   | -7.58                | 6.69   |
|                     | 2.0(LLOQ)                       | 6.33         | 5.56   | 4.25      | 6.99   | 4.08       | 3.85   | -0.75                | 9.54   |
|                     | 4.0(Low)                        | 4.63         | 4.92   | -0.13     | 6.00   | 1.67       | 6.54   | 8.42                 | 3.13   |
| Liquiritin          | 200.0(Medium)                   | 0.83         | 14.98  | 10.00     | 5.09   | 3.50       | 6.50   | -0.67                | 14.34  |
|                     | 2000.0(High)                    | -14.75       | 14.51  | 2.11      | 4.62   | -10.83     | 4.08   | -3.33                | 6.05   |
|                     | 2.0(LLOQ)                       | 4.08         | 3.59   | -1.58     | 4.83   | 2.25       | 8.10   | 9.00                 | 4.20   |
| Liquiritin          | 4.0(Low)                        | 7.54         | 5.00   | 7.79      | 4.35   | 4.58       | 5.01   | -1.42                | 4.23   |
|                     | 200.0(Medium)                   | 8.33         | 8.84   | 10.67     | 2.81   | 5.50       | 9.40   | -2.58                | 9.17   |

|                  |               |       |      |       |       |       |      |       |       |
|------------------|---------------|-------|------|-------|-------|-------|------|-------|-------|
|                  | 2000.0(High)  | 5.50  | 3.10 | 6.08  | 1.47  | 2.33  | 6.00 | -7.58 | 6.69  |
|                  | 2.0(LLOQ)     | 9.67  | 8.99 | -5.33 | 6.34  | -7.42 | 6.84 | 11.00 | 6.92  |
| Magnolol         | 4.0(Low)      | 3.50  | 8.11 | 6.08  | 8.87  | 3.50  | 5.98 | 7.04  | 3.51  |
|                  | 200.0(Medium) | 8.92  | 6.68 | 9.92  | 2.41  | 1.58  | 8.29 | 8.00  | 5.39  |
|                  | 2000.0(High)  | 1.75  | 7.07 | -2.08 | 6.58  | 4.75  | 6.69 | 2.42  | 5.40  |
|                  | 2.0(LLOQ)     | 3.67  | 3.38 | -1.25 | 7.76  | 5.67  | 3.56 | 9.50  | 7.10  |
| Meranzin hydrate | 4.0(Low)      | 0.29  | 4.75 | 2.08  | 3.78  | 0.38  | 5.74 | 0.50  | 2.74  |
|                  | 200.0(Medium) | -1.33 | 5.24 | -1.00 | 4.37  | -9.50 | 5.04 | -4.17 | 8.88  |
|                  | 2000.0(High)  | -5.75 | 4.37 | -7.42 | 3.90  | -3.92 | 7.88 | -6.92 | 3.67  |
|                  | 2.0(LLOQ)     | 4.50  | 6.10 | 5.75  | 4.91  | -6.67 | 5.12 | 1.00  | 8.53  |
| Naringin         | 4.0(Low)      | 2.71  | 8.31 | 1.88  | 6.07  | 0.29  | 5.07 | 0.08  | 5.78  |
|                  | 200.0(Medium) | 7.92  | 6.50 | 10.83 | 2.63  | 6.92  | 6.23 | 9.33  | 4.62  |
|                  | 2000.0(High)  | 0.29  | 4.39 | 8.46  | 3.91  | 4.49  | 4.64 | 3.00  | 5.49  |
|                  | 2.0(LLOQ)     | -3.17 | 8.72 | -0.42 | 13.49 | 1.67  | 6.91 | 16.50 | 11.08 |
| Paeoniflorin     | 4.0(Low)      | 7.42  | 3.76 | 3.04  | 7.16  | 1.25  | 6.36 | -1.92 | 1.54  |
|                  | 200.0(Medium) | 13.50 | 2.31 | 9.83  | 3.00  | 6.58  | 2.62 | 9.67  | 5.04  |
|                  | 2000.0(High)  | 8.42  | 5.23 | 10.50 | 3.04  | 15.00 | 9.53 | -0.73 | 8.27  |
|                  | 2.0(LLOQ)     | 9.08  | 4.18 | 9.58  | 5.52  | 5.33  | 7.56 | 5.92  | 10.02 |
| Puerarin         | 4.0(Low)      | 3.13  | 9.04 | 3.92  | 7.78  | 3.00  | 2.04 | -0.63 | 4.99  |
|                  | 200.0(Medium) | 13.83 | 2.71 | 13.00 | 2.41  | 14.41 | 1.71 | 13.17 | 1.74  |
|                  | 2000.0(High)  | -0.92 | 6.87 | -4.92 | 8.59  | 5.58  | 4.17 | -1.58 | 3.85  |

## Reference

1. L. Chen, J. Qi, Y.-X. Chang, D. Zhu and B. Yu, *Journal of pharmaceutical and biomedical analysis*, 2009, **50**, 127-137.
2. X. Gao, W. Sun, Q. Fu and X. Niu, *Journal of separation science*, 2014, **37**, 53-60.
3. H. Xiang, L. Zhang, J. Song, B. Fan, Y. Nie, D. Bai and H. Lei, *International journal of molecular sciences*, 2016, **17**, 1409.
4. J. Liu, L. Chen, C. Fan, H. Li, M. Huang, Q. Xiang, W. Xu, K. Chu and Y. Lin, *Zhongguo Zhong yao za zhi= Zhongguo zhongyao zazhi= China journal of Chinese materia medica*, 2015, **40**, 1762-1770.
5. M. Wen-Juan, H. Ying, J. Li, C.-X. ZHANG, Y. Wen-Zhi, P. ZHANG and G. De-An, *Chinese journal of natural medicines*, 2018, **16**, 791-800.
6. X. Sun, X.-b. Cui, H.-m. Wen, C.-x. Shan, X.-z. Wang, A. Kang, C. Chai and W. Li, *Journal of Pharmaceutical and Biomedical Analysis*, 2017, **141**, 19-31.
7. L.-L. Xu, J.-J. Xu, K.-R. Zhong, Z.-P. Shang, F. Wang, R.-F. Wang, L. Zhang, J.-Y. Zhang and B. Liu, *Molecules*, 2017, **22**, 1756.
8. Z. Fu, Y. Ling, Z. Li, M. Chen, Z. Sun and C. Huang, *Biomedical Chromatography*, 2014, **28**, 475-485.
9. Q. He, Z.-W. Ge, Y. Song and Y.-Y. Cheng, *Chemical and pharmaceutical bulletin*, 2006, **54**, 1271-1275.
10. S. Xu, L. Yang, M. Zhang and Z. Wang, *Yao xue xue bao= Acta pharmaceutica Sinica*, 2006, **41**, 852-856.
11. Q. Wang, Y. Qian, Q. Wang, Y. F. Yang, S. Ji, W. Song, X. Qiao, D. A. Guo, H. Liang and M. Ye, *J Pharm Biomed Anal*, 2015, **115**, 515-522.
12. Y. F. Wong, F. Cacciola, S. Fermas, S. Riga, D. James, V. Manzin, B. Bonnet, P. J. Marriott, P. Dugo and L. Mondello, *Electrophoresis*, 2018, **39**, 1993-2000.
13. Z.-H. Su, G.-A. Zou, A. Preiss, H.-W. Zhang and Z.-M. Zou, *Journal of pharmaceutical and*

- biomedical analysis*, 2010, **53**, 454-461.
14. Y. Yan, C.-Z. Chai, D.-W. Wang, X.-Y. Yue, D.-N. Zhu and B.-Y. Yu, *Journal of pharmaceutical and biomedical analysis*, 2013, **80**, 192-202.
  15. Y. Bai, Y. Zheng, W. Pang, W. Peng, H. Wu, H. Yao, P. Li, W. Deng, J. Cheng and W. Su, *Molecules*, 2018, **23**, 803.
  16. Y. He, Z. Li, W. Wang, S. R. Sooranna, Y. Shi, Y. Chen, C. Wu, J. Zeng, Q. Tang and H. Xie, *Molecules*, 2018, **23**, 2189.
  17. Z. Xue, C. Lai, L. Kang, A. Kotani, H. Hakamata, Z. Jing, H. Li, W. Wang and B. Yang, *Journal of Chromatography A*, 2020, **1611**, 460583.
  18. X. Nöst, E.-M. Pferschy-Wenzig, S. Nikles, X. He, D. Fan, A. Lu, J. Yuk, K. Yu, G. Isaac and R. Bauer, *Molecules*, 2019, **24**, 3116.
  19. Z. Wei, W. Xue, p. Yan jing, Y. J. Li, Y. A. Bi, Z. Z. Wang and W. Xiao, *Zhongguo Zhong Yao Za Zhi*, 2014, **39**, 4118-4122.
  20. H.-M. Yang, B. Yang, Y.-M. Hu, L. Cao, Z.-Z. Wang, K.-J. Zhu and W. Xiao, *Zhongguo Zhong yao za zhi= Zhongguo Zhongyao Zazhi= China Journal of Chinese Materia Medica*, 2020, **45**, 861-877.
